# Supplementary material
Source: PubMed Central journal article supplement (PMC10288378)

## Supplementary Online Content

Lee ARYB, Low CE, Yau CE, Li J, Ho R, Ho CSH. Lifetime burden of psychological symptoms, disorders, and suicide due to cancer in childhood, adolescent, and young adult years: a systematic review and meta-analysis. *JAMA Pediatr*. Published online June 22, 2023. doi:10.1001/jamapediatrics.2023.2168

**eTable 1.** Search Strategy

**eTable 2.** Characteristics of Included Studies of Childhood, Adolescent, and Young Adult Cancer Patients

**eTable 3.** Methods and Scales for Assessing Depression

**eTable 4.** Meta-analyses of Risk of Severe Depression Stratified by Categorical Study-Level Characteristics Using the Random-Effects Model

**eTable 5.** Meta-analyses of Risk of Severe Depression Stratified by Categorical Study-Level Characteristics Using the Common Effect Model

**eTable 6.** Meta-analyses of Depression Symptom Severity Stratified by Categorical Study-Level Characteristics Using the Common Effect Model

**eTable 7.** Mixed Effects Meta-regression of Standardized Mean Differences Against Potential Effect Moderators (Continuous and Categorical Study-Level Characteristics) for the Longitudinal Association of Depression Symptom Severity in Pediatric Cancer

**eTable 8.** Methods and Scales for Assessing Anxiety

**eTable 9.** Meta-analyses of Risk of Severe Anxiety Stratified by Categorical Study-Level Characteristics Using the Random Effects Model

**eTable 10.** Meta-analyses of Risk of Severe Anxiety Stratified by Categorical Study-Level Characteristics Using the Common Effect Model

**eTable 11.** Meta-analyses of Anxiety Symptom Severity Stratified by Categorical Study-Level Characteristics Using the Common Effect Model

**eTable 12.** Mixed Effects Meta-regression of Standardized Mean Differences Against Potential Effect Moderators (Continuous and Categorical Study-Level Characteristics) for the Longitudinal Association of Anxiety Symptom Severity in Pediatric Cancer

**eTable 13.** Psychotic Disorders Assessed and Method of Diagnosis

**eTable 14.** Evaluation of the Mediating or Confounding Effect of Education Level of Participants on Psychological Outcomes

**eTable 15.** Evaluation of the Mediating or Confounding Effect of Income and Socioeconomic Status of Participants on Psychological Outcomes

**eTable 16.** Evaluation of the Mediating or Confounding Effect of Social Environment and Degree of Social Support of Participants on Psychological Outcomes

**eTable 17.** Quality Assessment of Included Cohort Studies Using the Joanna Brigg Institute Critical Appraisal Tool

**eFigure 1.** Depressive Symptom Score in CYACs, Compared to Noncancer Controls, Using the Random-Effects Model (Primary Analysis) and Common Effect Model (Sensitivity Analysis)

**eFigure 2.** Subgroup Analyses of Depression Symptom Severity Stratified by Scales Using the Random-Effects Model

**eFigure 3.** Anxiety Symptom Score in CYACs, Compared With Noncancer Controls, Using the Random-Effects Model (Primary Analysis) and Common Effect Model (Sensitivity Analysis)

**eFigure 4.** Subgroup Analyses of Anxiety Symptom Severity Stratified by Scales Using the Random-Effects Model

**eFigure 5.** Suicide Mortality per 100 000 Person-Years in Children, Adolescent, and Young Adult Patients With Cancer (CYACs) Compared With Controls Without Cancer

**eFigure 6.** Funnel Plot for Visual Inspection of Publication Bias in Studies Assessing Risk of Severe Depression

**eFigure 7.** Trim-and-Fill Plot for Publication Bias in Studies Assessing Risk of Severe Depression

**eFigure 8.** Quantitative Assessment Publication Bias in Studies Assessing Risk of Severe Depression

**eFigure 9.** Outlier Assessment of Studies Assessing the Risk of Severe Depression of CYACs, Compared With Noncancer Controls, Using the Random-Effects Model (Primary Analysis) and Common Effect Model (Sensitivity Analysis)

**eFigure 10.** Leave-One-Out Analysis of Studies Assessing the Risk of Severe Depression, Compared With Noncancer Controls, Using the Random-Effects Model (Primary Analysis) and Common Effect Model (Sensitivity Analysis)

**eFigure 11.** Funnel Plot for Visual Inspection of Publication Bias in Studies Assessing Depressive Symptom Score

**eFigure 12.** Trim-and-Fill Plot for Publication Bias in Studies Assessing Depressive Symptom Score

**eFigure 13.** Quantitative Assessment Publication Bias in Studies Assessing Depressive Symptom Score

**eFigure 14.** Outlier Assessment of Studies Assessing the Depressive Symptom Score of CYACs, Compared With Noncancer Controls, Using the Random-Effects Model (Primary Analysis) and Common Effect Model (Sensitivity Analysis)

**eFigure 15.** Leave-One-Out Analysis of Studies Assessing the Depressive Symptom Score, Compared With Noncancer Controls, Using the Random-Effects Model (Primary Analysis) and Common Effect Model (Sensitivity Analysis)

**eFigure 16.** Funnel Plot for Visual Inspection of Publication Bias in Studies Assessing Risk of Severe Anxiety

**eFigure 17.** Trim-and-Fill Plot for Publication Bias in Studies Assessing Risk of Severe Anxiety

**eFigure 18.** Quantitative Assessment Publication Bias in Studies Assessing Risk of Severe Anxiety

**eFigure 19.** Outlier Assessment of Studies Assessing the Risk of Severe Anxiety of CYACs, Compared With Noncancer Controls, Using the Random-Effects Model (Primary Analysis) and Common Effect Model (Sensitivity Analysis)

**eFigure 20.** Leave-One-Out Analysis of Studies Assessing the Risk of Severe Anxiety, Compared With Noncancer Controls, Using the Random-Effects Model (Primary Analysis) and Common Effect Model (Sensitivity Analysis)

**eFigure 21.** Funnel Plot for Visual Inspection of Publication Bias in Studies Assessing Anxiety Symptom Score

**eFigure 22.** Trim-and-Fill Plot for Publication Bias in Studies Assessing Anxiety Symptom Score

**eFigure 23.** Quantitative Assessment Publication Bias in Studies Assessing Anxiety Symptom Score

**eFigure 24.** Outlier Assessment of Studies Assessing the Anxiety Symptom Score of CYACs, Compared With Noncancer Controls, Using the Random-Effects Model (Primary Analysis) and Common Effect Model (Sensitivity Analysis)

**eFigure 25.** Leave-One-Out Analysis of Studies Assessing the Anxiety Symptom Score, Compared With Noncancer Controls, Using the Random-Effects Model (Primary Analysis) and Common Effect Model (Sensitivity Analysis)

This supplementary material has been provided by the authors to give readers additional information about their work.

**eTable 1:** Search strategy

**EMBASE**

|    |                                                                                                                                                                                        |
|----|----------------------------------------------------------------------------------------------------------------------------------------------------------------------------------------|
| #1 | (Pediatric* OR paediatric* OR juvenile* OR “young adult*” OR ‘childhood’):ti,ab                                                                                                        |
| #2 | "neoplasm"/exp or (‘neoplasm’ OR ‘cancer*’ OR ‘tumo*’ OR ‘malign*’ OR ‘leukemia*’ OR ‘lymphoma*’):ti,ab                                                                                |
| #3 | (‘depression’ OR ‘depressive’ OR ‘anxiety’ OR ‘anxiety disorder’ OR ‘suicidal behavior’ OR ‘suicide’ OR ‘schizophrenia’ OR ‘schizo*’ OR ‘psychosis’ OR ‘psychotic’ OR ‘psychoses’)/exp |

#1 and #2 and #3 and NOT [medline]/lim

**PubMed**

|    |                                                                                                                                                                                                                                                                                                                                                                                                                                                                        |
|----|------------------------------------------------------------------------------------------------------------------------------------------------------------------------------------------------------------------------------------------------------------------------------------------------------------------------------------------------------------------------------------------------------------------------------------------------------------------------|
| #1 | ("Pediatric*[Title/Abstract] OR "paediatric*[Title/Abstract] OR "Young Adult"[Title/Abstract] OR "Child*[Title/Abstract] OR juvenile*[Title/Abstract] OR infant*[Title/Abstract] OR adolesc*[Title/Abstract])                                                                                                                                                                                                                                                          |
| #2 | (neoplas*[Title/Abstract] OR cancer*[Title/Abstract] OR tumo*[Title/Abstract] OR malign*[Title/Abstract] OR leukemia*[Title/Abstract] OR lymphoma*[Title/Abstract]))                                                                                                                                                                                                                                                                                                   |
| #3 | ("Anxiety"[Mesh] OR "Anxiety Disorders"[Mesh] OR "Post-Traumatic*[Title/Abstract] OR "PTSD"[Title/Abstract] OR "posttraumatic*[Title/Abstract] OR "Post Traumatic*[Title/Abstract] OR "Depress*[Title/Abstract] OR "Depressive*[Title/Abstract] OR "Anxi*[Title/Abstract] OR "Suicid*[Title/Abstract] OR "Schizophrenia"[Mesh] OR 'Disorder*, Schizophrenic'[Title/Abstract] OR Schizo*[Title/Abstract] OR “Psychotic”[Title/Abstract] OR “Psychosis”[Title/Abstract]) |

#1 and #2 and #3

**eTable 2:** Characteristics of included studies of childhood, adolescent and young adult cancer patients

| Study                   | Publication year | Country of study         | Cancer type | Proportion receiving chemotherapy (0 to 1) | Proportion receiving surgery (0 to 1) | Proportion receiving radiotherapy (0 to 1) | Control characteristics   | Age at cancer diagnosis* | Age at follow-up / last outcome assessment* |
|-------------------------|------------------|--------------------------|-------------|--------------------------------------------|---------------------------------------|--------------------------------------------|---------------------------|--------------------------|---------------------------------------------|
| Korhonen et al          | 2019             | Denmark, Sweden, Finland | Various     | NR                                         | NR                                    | NR                                         | Matched control           | NR                       | Reported in strata                          |
| Kunin-Batson et al      | 2016             | USA                      | ALL         | 1                                          | NR                                    | NR                                         | Normative population data | Range: 1-9.9             | Range: 2-10.9                               |
| Gupta et al             | 2014             | India                    | ALL         | 1                                          | 0                                     | 0                                          | Matched control           | NR                       | Range: 6-14                                 |
| Myers et al             | 2014             | USA                      | ALL         | 1                                          | 0                                     | 0                                          | Normative population data | 4.9 (2.2)                | 5.9 (2.2)                                   |
| Monteiro et al (Cancer) | 2013             | Portugal                 | Various     | 0.527                                      | 0.611                                 | 0.194                                      | Matched control           | NR                       | 28                                          |
| Arabiat et al           | 2012             | Jordan                   | Various     | 1                                          | NR                                    | NR                                         | Matched control           | NR                       | 11 (2.6)                                    |
| Yaffe Ornstein et al    | 2022             | Israel                   | Various     | NR                                         | NR                                    | NR                                         | Caregivers                | 10.04 (5.99)             | 11.56 (6.05)                                |
| Sargin Yildirim et al   | 2017             | Turkey                   | Various     | 1                                          | 0.36                                  | 0.58                                       | Parents                   | 12.14 (2.97)             | 12.39 (2.97)                                |
| Jorngarden et al        | 2007             | Sweden                   | Various     | 1                                          | NR                                    | NR                                         | Normative population data | 15.7                     | NR                                          |
| Larsson et al           | 2010             | Sweden                   | Various     | NR                                         | NR                                    | NR                                         | Matched control           | Range: 13-19             | 4 years after diagnosis                     |
| Yang et al              | 2021             | USA                      | Various     | NR                                         | NR                                    | NR                                         | Normative population data | NR                       | NR                                          |

|                                |      |             |                |       |       |             |                           |                    |                               |
|--------------------------------|------|-------------|----------------|-------|-------|-------------|---------------------------|--------------------|-------------------------------|
| Hoven et al                    | 2020 | Sweden      | Various        | NR    | NR    | NR          | Matched control           | NR                 | Median: 16.5                  |
| Lund et al                     | 2013 | Denmark     | Various        | NR    | NR    | NR          | Matched control           | Reported in strata | 5 years after treatment ended |
| Kremer et al                   | 2016 | Germany     | Various        | NR    | NR    | NR          | Matched control           | 8.1 (5.1)          | 23.8 (3.8)                    |
| Ford et al                     | 2015 | USA         | RB             | 0.253 | 0.855 | 0.564       | Siblings                  | 1                  | 43.3                          |
| Cantrell et al                 | 2014 | USA         | Various        | NR    | NR    | NR          | Matched control           | NR                 | Range: 24 to 34               |
| Monteiro et al (Survivors)     | 2013 | Portugal    | Various        | 0.527 | 0.611 | 0.194       | Matched control           | NR                 | 28.76                         |
| van der Geest et al            | 2013 | Netherlands | Various        | NR    | 0.02  | 0.236196319 | Normative population data | NR                 | 23 (Range: 15-46)             |
| Cizek Sajko et al              | 2012 | Slovenia    | Various        | 0.72  | 0.53  | 0.56        | Matched control           | 8.2 (4.9)          | 22.3 (11.9)                   |
| Harila et al                   | 2011 | Finland     | ALL            | 1     | 0     | 0.62        | Matched control           | 5 (Range: 0-15)    | 24 (Range: 17-37)             |
| Tillery et al                  | 2019 | USA         | Various        | 1     | NR    | NR          | Matched control           | 2.15 (1.43)        | 4.48 (1.11)                   |
| Ahomaki et al                  | 2015 | Finland     | Various        | NR    | NR    | NR          | Siblings                  | NR                 | NR                            |
| Zebrack et al (Haematological) | 2002 | USA         | Haematological | 1     | 0     | 0.401       | Siblings                  | 10.1 (5.5)         | 26.9 (6.2)                    |
| Prasad et al                   | 2015 | USA         | Various        | 1     | 0.079 | 0.4         | Siblings                  | Range: 11-21       | >25                           |
| Seitz et al                    | 2010 | Germany     | Various        | 0.905 | 0.718 | 0.578       | Matched control           | 15.78 (0.89)       | 30.4 (6)                      |

|                              |      |           |                   |       |       |       |                           |                    |                     |
|------------------------------|------|-----------|-------------------|-------|-------|-------|---------------------------|--------------------|---------------------|
| Akechi et al                 | 2022 | Japan     | Various           | 1     | NR    | NR    | Matched control           | NR                 | 32.5 (6.3)          |
| Liu et al                    | 2018 | USA       | ALL               | 1     | NR    | NR    | Non-participants          | 4.6 (2.4)          | 12.1 (2.6)          |
| Nathan et al                 | 2018 | USA       | Various           | 0.734 | 0.546 | 0.215 | Matched control           | Reported in strata | 7.5 (Range: 1-21.9) |
| Zheng et al                  | 2018 | USA       | Neuroblastoma     | 0.396 | 0.979 | 0.258 | Siblings                  | Reported in strata | Reported in strata  |
| Foster et al                 | 2017 | USA       | Wilm's tumour     | 1     | 1     | 1     | Siblings                  | 2.8 (1.8)          | 15.3 (1.7)          |
| de Laage et al               | 2016 | France    | Various           | 0.899 | 0.816 | 0.675 | Normative population data | 7 (5.1)            | 38.5 (8.5)          |
| Kanellopoulos et al          | 2013 | Norway    | ALL               | NR    | NR    | NR    | Matched control           | 9.5 (5.3)          | 31 (8.2)            |
| Li et al                     | 2013 | Hong Kong | Various           | 0.482 | 0.036 | 0     | Matched control           | NR                 | Reported in strata  |
| Krull et al                  | 2011 | USA       | Various           | 1     | NR    | NR    | Siblings                  | NR                 | 32 (7.6)            |
| Schrag et al                 | 2008 | USA       | Various           | NR    | NR    | NR    | Matched control           | Range: 0-15        | NR                  |
| Pedreira et al               | 2006 | Australia | Craniopharyngioma | NR    | 1     | 0.46  | Matched control           | 8.08 (3.65)        | 21.1 (6.7)          |
| Zebrack et al (Brain cancer) | 2004 | USA       | Various           | 0.211 | NR    | 1     | Siblings                  | 26.5 (5.5)         | NR                  |
| Hudon et al                  | 2003 | USA       | Various           | 0.777 | 0.835 | 0.716 | Siblings                  | 10 (5.6)           | 26.8 (6.2)          |
| De et al                     | 2021 | Canada    | Various           | 0.776 | 0.41  | 0.7   | Matched control           | 18 (16-20)         | NR                  |

|                              |      |             |                |       |       |       |                           |                    |                    |
|------------------------------|------|-------------|----------------|-------|-------|-------|---------------------------|--------------------|--------------------|
| Zebrack et al (Solid cancer) | 2007 | USA         | Solid cancers  | 1     | NR    | NR    | Siblings                  | NR                 | 27.1 (6.0)         |
| Schwartz et al               | 2006 | USA         | Various        | 1     | NR    | NR    | Matched control           | 11.35 (3.91)       | 21.7 (2.65)        |
| Ross et al                   | 2003 | Denmark     | Various        | NR    | NR    | 1     | Normative population data | NR                 | Reported in strata |
| Barnes et al                 | 2022 | USA         | Various        | NR    | NR    | NR    | Normative population data | Reported in strata | NR                 |
| Ljungman et al               | 2022 | Sweden      | Brain cancers  | 0.633 | NR    | 1     | Matched control           | 8.5 (4.3)          | 28.1 (6.8)         |
| Shin et al                   | 2022 | USA         | Various        | 0.776 | 0.709 | 0.581 | Matched control           | 3.8                | 31.9 (8.3)         |
| Aili et al                   | 2021 | Sweden      | Leukaemias     | NR    | NR    | 0.044 | Siblings                  | 6 (Range: 0-15)    | 28 (Range: 23-41)  |
| van Erp et al                | 2021 | Netherlands | Various        | 0.954 | 0.616 | 0.371 | Normative population data | 10.5 (4.5)         | 24.1 (3.6)         |
| Barone et al                 | 2020 | Italy       | Various        | NR    | NR    | NR    | Matched control           | 4.26 (2.81)        | 12.9( 3.1)         |
| Yen et al                    | 2020 | USA         | Haematological | NR    | NR    | NR    | Matched control           | NR                 | 28.4 (5.9)         |
| Brinkman et al               | 2019 | USA         | Various        | NR    | NR    | NR    | Siblings                  | 10                 | 34.8 (6.1)         |
| D'Souza et al                | 2019 | USA         | Various        | NR    | NR    | NR    | Matched control           | NR                 | 18.6 (0.7)         |
| Huang et al                  | 2017 | USA         | Various        | 0.8   | NR    | 0.658 | Siblings                  | NR                 | 31.8 (7.5)         |
| Kazak et al                  | 2010 | USA         | Various        | NR    | NR    | NR    | Matched control           | NR                 | 20.5 (3.2)         |



|               |      |             |         |    |    |    |                           |              |              |
|---------------|------|-------------|---------|----|----|----|---------------------------|--------------|--------------|
| Michel et al  | 2010 | Switzerland | Various | NR | NR | NR | Normative population data | <16          | >20          |
| Yardeni et al | 2021 | Israel      | Various | NR | NR | NR | Parents                   | 13.56 (3.63) | 14.56 (3.63) |

Abbreviations: ALL, Acute lymphoblastic leukaemia; NR, Not reported; RB, Retinoblastoma

\*Mean (standard deviation) reported where available, unless otherwise stated.

**eTable 3:** Instruments, scales and diagnostic criteria used for depression and depressive symptoms by each included study

| Study                          | Publication year | Country of study | Number (%)  | Scale used to assess depression                         |
|--------------------------------|------------------|------------------|-------------|---------------------------------------------------------|
| Kunin-Batson et al             | 2016             | USA              | 2/44 (4.5%) | Behavior Assessment System for Children, Second Edition |
| Myers et al                    | 2014             | USA              |             | Behavior Assessment System for Children, Second Edition |
| Ljungman et al                 | 2022             | Sweden           | 2/44 (4.5%) | Beck's Depression Inventory - 21                        |
| Harila et al                   | 2011             | Finland          |             | Beck's Depression Inventory - 21                        |
| Zheng et al                    | 2018             | USA              | 2/44 (4.5%) | Basic Personality Inventory - 32                        |
| Foster et al                   | 2017             | USA              |             | Basic Personality Inventory - 32                        |
| Brinkman et al                 | 2019             | USA              | 10/44 (23%) | Brief Symptom Inventory                                 |
| de Laage et al                 | 2016             | France           |             | Brief Symptom Inventory                                 |
| Prasad et al                   | 2015             | USA              |             | Brief Symptom Inventory                                 |
| Krull et al                    | 2011             | USA              |             | Brief Symptom Inventory                                 |
| Zebrack et al (Brain cancer)   | 2004             | USA              |             | Brief Symptom Inventory                                 |
| Zebrack et al (Solid cancer)   | 2007             | USA              |             | Brief Symptom Inventory                                 |
| Ford et al                     | 2015             | USA              |             | Brief Symptom Inventory                                 |
| Shin et al                     | 2022             | USA              |             | Brief Symptom Inventory                                 |
| Zebrack et al (Haematological) | 2002             | USA              |             | Brief Symptom Inventory                                 |
| Kazak et al                    | 2010             | USA              |             | Brief Symptom Inventory                                 |

|                         |      |             |             |                                                                   |
|-------------------------|------|-------------|-------------|-------------------------------------------------------------------|
| Arabi et al             | 2012 | Jordan      | 3/44 (6.8%) | Children's Depression Inventory                                   |
| Sargin Yildirim et al   | 2017 | Turkey      |             | Children's Depression Inventory                                   |
| Barone et al            | 2020 | Italy       |             | Children's Depression Inventory                                   |
| Li et al                | 2013 | Hong Kong   | 2/44 (4.5%) | Center for Epidemiological Studies - Depression Scale             |
| Schwartz et al          | 2006 | USA         |             | Center for Epidemiological Studies - Depression Scale             |
| Gupta et al             | 2014 | India       | 1/44 (2.3%) | Childhood Psychopathology Measurement Schedule                    |
| Aili et al              | 2021 | Sweden      | 1/44 (2.3%) | Depression Anxiety and Stress Scale - 21                          |
| Liu et al               | 2018 | USA         | 1/44 (2.3%) | Diagnostic Interview for Children and Adolescents - IV            |
| Seitz et al             | 2010 | Germany     | 1/44 (2.3%) | Diagnostic and Statistical Manual of Mental Disorders 4th Edition |
| Larsson et al           | 2010 | Sweden      | 8/44 (18%)  | Hospital Anxiety and Depression Scale                             |
| Monteiro et al (Cancer) | 2013 | Portugal    |             | Hospital Anxiety and Depression Scale                             |
| Jornsgarden et al       | 2007 | Sweden      |             | Hospital Anxiety and Depression Scale                             |
| Kremer et al            | 2016 | Germany     |             | Hospital Anxiety and Depression Scale                             |
| Monteiro (Survivors)    | 2013 | Portugal    |             | Hospital Anxiety and Depression Scale                             |
| van der Geest et al     | 2013 | Netherlands |             | Hospital Anxiety and Depression Scale                             |
| Kanellopoulos et al     | 2013 | Norway      |             | Hospital Anxiety and Depression Scale                             |
| van Erp et al           | 2021 | Netherlands |             | Hospital Anxiety and Depression Scale                             |

|                |      |           |             |                                                               |
|----------------|------|-----------|-------------|---------------------------------------------------------------|
| Akechi et al   | 2022 | Japan     | 5/44 (11%)  | International Classification of Diseases 10th Revision        |
| Hoven et al    | 2020 | Sweden    |             | International Classification of Diseases 10th Revision        |
| Nathan et al   | 2018 | USA       |             | International Classification of Diseases 10th Revision        |
| Lund et al     | 2013 | Denmark   |             | International Classification of Diseases 8th to 10th Revision |
| Ahomaki et al  | 2015 | Finland   |             | International Classification of Diseases 8th to 10th Revision |
| D'Souza et al  | 2019 | USA       | 2/44 (4.5%) | Kiddie Schedule for Affective Disorders and Schizophrenia     |
| Yardeni et al  | 2021 | Israel    |             | Kiddie Schedule for Affective Disorders and Schizophrenia     |
| Pedreira et al | 2006 | Australia | 1/44 (2.3%) | Psychological General Well-Being Index                        |
| Yen et al      | 2020 | USA       | 3/44 (6.8%) | Unspecified                                                   |
| Cantrell et al | 2014 | USA       |             | Unspecified                                                   |
| Huang et al    | 2017 | USA       |             | Unspecified                                                   |

**eTable 4:** Meta-analyses of risk of severe depression stratified by categorical study-level characteristics using the random effects model

| Variable                                       | Cohorts | N, cancer | N, control | RR   | 95% CI       | I2  | Test of interaction (p-value) |
|------------------------------------------------|---------|-----------|------------|------|--------------|-----|-------------------------------|
| Overall                                        | 9       | 27,613    | 274,539    | 1.57 | 1.24 to 1.99 | 91% | NA                            |
| Age at diagnosis between 5 and 12 years        | 3       | 4,893     | 1,341      | 1.78 | 1.50 to 2.10 | 0%  | 0.4802                        |
| Age at diagnosis between 12 and 18 years       | 1       | 820       | 1,027      | 1.59 | 1.24 to 2.05 | NA  |                               |
| Age at data collection between 5 and 12 years  | 1       | 4,117     | 20,269     | 1.35 | 0.69 to 2.62 | NA  | <0.001                        |
| Age at data collection between 12 and 18 years | 1       | 2,822     | 28,220     | 1.31 | 0.68 to 2.52 | NA  |                               |
| Age at data collection between 25 and 30 years | 2       | 2,816     | 460        | 1.45 | 0.77 to 2.71 | 0%  |                               |
| Age at data collection above 30 years          | 3       | 6,456     | 37,498     | 2.12 | 1.44 to 3.12 | 92% |                               |
| Compared to matched controls                   | 5       | 18,403    | 229,806    | 1.60 | 1.15 to 2.22 | 95% |                               |
| Compared to siblings                           | 4       | 9,210     | 44,733     | 1.52 | 1.01 to 2.30 | 58% | 0.86                          |

Abbreviations: RR, risk ratio; NA, not applicable; CI, confidence interval

**eTable 5:** Meta-analyses of risk of severe depression stratified by categorical study-level characteristics using the common effect model

| Variable                                       | Cohorts | N, cancer | N, control | RR   | 95% CI       | I2  | Test of interaction (p-value) |
|------------------------------------------------|---------|-----------|------------|------|--------------|-----|-------------------------------|
| Overall                                        | 9       | 27,613    | 274,539    | 1.60 | 1.50 to 1.72 | 91% | NA                            |
| Age at diagnosis between 5 and 12 years        | 3       | 4,893     | 1,341      | 1.78 | 1.50 to 2.10 | 0%  | 0.4802                        |
| Age at diagnosis between 12 and 18 years       | 1       | 820       | 1,027      | 1.59 | 1.24 to 2.05 | NA  |                               |
| Age at data collection between 5 and 12 years  | 1       | 4,117     | 20,269     | 1.35 | 1.11 to 1.64 | NA  | 0.46                          |
| Age at data collection between 12 and 18 years | 1       | 2,822     | 28,220     | 1.31 | 1.13 to 1.52 | NA  |                               |
| Age at data collection between 25 and 30 years | 2       | 2,816     | 460        | 1.45 | 1.04 to 2.04 | 0%  |                               |
| Age at data collection above 30 years          | 3       | 6,456     | 37,498     | 2.12 | 2.05 to 2.56 | 92% |                               |
| Compared to matched controls                   | 5       | 18,403    | 229,806    | 1.62 | 1.49 to 1.75 | 95% |                               |
| Compared to siblings                           | 4       | 9,210     | 44,733     | 1.56 | 1.37 to 1.78 | 58% | 0.68                          |

Abbreviations: RR, risk ratio; NA, not applicable; CI, confidence interval

**eTable 6:** Meta-analyses of depressive symptom severity stratified by categorical study-level characteristics using the common effect model

| Variable                                       | Cohorts | N, cancer | N, control | SMD   | 95% CI         | I2  | Test of interaction (p-value) |
|------------------------------------------------|---------|-----------|------------|-------|----------------|-----|-------------------------------|
| Overall                                        | 21      | 6,717     | 22,607     | 0.22  | 0.19 to 0.25   | 92% | NA                            |
| In remission                                   | 16      | 6,491     | 21,367     | 0.21  | 0.18 to 0.24   | 93% | <0.001                        |
| Undergoing or recent treatment                 | 5       | 226       | 1,240      | 0.48  | 0.33 to 0.64   | 76% |                               |
| Age at diagnosis less than 5 years             | 2       | 510       | 2,899      | -0.14 | -0.24 to -0.05 | 0%  | <0.001                        |
| Age at diagnosis between 5 and 12 years        | 5       | 332       | 794        | 0.17  | 0.04 to 0.30   | 74% |                               |
| Age at diagnosis between 12 and 18             | 1       | 56        | 391        | 0.61  | 0.33 to 0.90   | NA  |                               |
| Age at data collection between 5 and 12 years  | 1       | 58        | 64         | -0.15 | -0.50 to 0.21  | NA  | 0.23                          |
| Age at data collection between 12 and 18 years | 3       | 767       | 1,075      | 0.21  | 0.11 to 0.31   | 91  |                               |
| Age at data collection between 18 and 25 years | 7       | 1,381     | 2,163      | 0.13  | 0.02 to 0.24   | 63% |                               |
| Age at data collection over 25 years           | 5       | 4,385     | 9,432      | 0.15  | 0.11 to 0.19   | 92% |                               |
| Europe                                         | 9       | 1,102     | 2,918      | 0.54  | 0.46 to 0.62   | 93% | <0.01                         |
| North America                                  | 8       | 5,362     | 17,757     | 0.16  | 0.12 to 0.19   | 87% |                               |

|                                                                                                                               |    |       |        |       |                |     |       |
|-------------------------------------------------------------------------------------------------------------------------------|----|-------|--------|-------|----------------|-----|-------|
| Asia                                                                                                                          | 3  | 235   | 1,914  | 0.27  | 0.12 to 0.41   | 74% |       |
| Australia                                                                                                                     | 1  | 18    | 18     | 0.09  | -0.56 to 0.75  | NA  |       |
| Compared to matched controls                                                                                                  | 17 | 1,702 | 13,349 | 0.42  | 0.36 to 0.48   | 89% | <0.01 |
| Compared to siblings                                                                                                          | 4  | 5,015 | 9,258  | 0.15  | 0.12 to 0.19   | 94% |       |
| Scale = Hospital Anxiety and Depression Scale                                                                                 | 6  | 928   | 2,393  | 0.65  | 0.57 to 0.74   | 89% | <0.01 |
| Scale = Novel questionnaire                                                                                                   | 1  | 66    | 8,186  | 0.41  | 0.16 to 0.65   | NA  |       |
| Scale = Childhood Psychopathology Measurement Schedule Depression                                                             | 1  | 40    | 50     | 0.60  | 0.17 to 1.02   | NA  |       |
| Scale = Children's Depression Inventory                                                                                       | 2  | 98    | 143    | -0.22 | -0.48 to 0.04  | 0%  |       |
| Scale = Beck's Depression Inventory-21                                                                                        | 1  | 73    | 146    | -0.32 | -0.60 to -0.04 | NA  |       |
| Scale = Behavior Problems Index-32                                                                                            | 1  | 666   | 696    | 0.17  | 0.07 to 0.28   | NA  |       |
| Scale = Center for Epidemiological Studies Depression Scale for Children /Center for Epidemiological Studies Depression Scale | 2  | 194   | 1,883  | 0.32  | 0.17 to 0.48   | 0%  |       |



|                                                                                                            |   |       |       |      |               |     |  |
|------------------------------------------------------------------------------------------------------------|---|-------|-------|------|---------------|-----|--|
| Scale = Psychological General Wellbeing                                                                    | 1 | 18    | 18    | 0.09 | -0.56 to 0.75 | NA  |  |
| Scale = Brief Symptom Inventory-18                                                                         | 3 | 4,046 | 5,912 | 0.20 | 0.15 to 0.24  | 84% |  |
| Scale = Schedule for Affective Disorders and Schizophrenia for School-Age Children Epidemiologic—version 5 | 1 | 57    | 60    | 0.05 | -0.32 to 0.41 | NA  |  |
| Scale = Subscales from 36-Item Short Form Survey and Hospital Anxiety and Depression Scale                 | 1 | 61    | 300   | 0.75 | 0.46 to 1.03  | NA  |  |

Abbreviations: SMD, standardised mean difference; NA, not applicable; CI, confidence interval

**eTable 7:** Mixed effects meta-regression of standardised mean differences against potential effect moderators (continuous and categorical study-level characteristics) for the longitudinal association of depression symptom severity in paediatric cancer

|                        | <b>Estimate</b> | <b>p-value</b> | <b>95% CI<br/>Lower</b> | <b>95% CI<br/>Upper</b> | <b>I<sup>2</sup> (% residual heterogeneity)</b> |
|------------------------|-----------------|----------------|-------------------------|-------------------------|-------------------------------------------------|
| Surgery                | -0.34           | 0.25           | -0.9225                 | 0.2418                  | 92.41%                                          |
| Chemo                  | 0.12            | 0.63           | -0.36                   | 0.60                    | 90.34%                                          |
| Radiotherapy           | -0.33           | 0.30           | -0.95                   | 0.29                    | 94.13%                                          |
| Age at diagnosis       | 0.06            | <.0001         | 0.03                    | 0.09                    | 41.69%                                          |
| Age at data collection | -0.01           | 0.58           | -0.02                   | 0.01                    | 90.04%                                          |

Abbreviations: CI, confidence interval.

**eTable 8:** Instruments, scales and diagnostic criteria used for anxiety disorders and anxiety symptoms by each included study

| Study                        | Publication year | Country of study | Number (%)  | Scale used to assess anxiety                                      |
|------------------------------|------------------|------------------|-------------|-------------------------------------------------------------------|
| Kunin-Batson et al           | 2016             | USA              | 2/33 (6.1%) | Behavior Assessment System for Children 2nd Edition               |
| Myers et al                  | 2014             | USA              |             | Behavior Assessment System for Children 2nd Edition               |
| Yardeni et al                | 2021             | Israel           | 1/33 (3.0%) | Kiddie Schedule for Affective Disorders and Schizophrenia         |
| Kazak et al                  | 2010             | USA              | 9/33 (27%)  | Brief Symptom Inventory                                           |
| Ford et al                   | 2015             | USA              |             | Brief Symptom Inventory                                           |
| Shin et al                   | 2022             | USA              |             | Brief Symptom Inventory                                           |
| Prasad et al                 | 2015             | USA              |             | Brief Symptom Inventory                                           |
| Zebrack et al (Brain cancer) | 2004             | USA              |             | Brief Symptom Inventory                                           |
| Zebrack et al (Solid cancer) | 2007             | USA              |             | Brief Symptom Inventory                                           |
| de Laage et al               | 2016             | France           |             | Brief Symptom Inventory                                           |
| Krull et al                  | 2011             | USA              |             | Brief Symptom Inventory                                           |
| Brinkman et al               | 2019             | USA              |             | Brief Symptom Inventory                                           |
| Aili et al                   | 2021             | Sweden           |             | 1/33 (3.0%)                                                       |
| Liu et al                    | 2018             | USA              | 1/33 (3.0%) | Diagnostic Interview for Children and Adolescents - IV            |
| Seitz et al                  | 2010             | Germany          | 1/33 (3.0%) | Diagnostic and Statistical Manual of Mental Disorders 4th Edition |
| Larsson et al                | 2010             | Sweden           | 7/33 (21%)  | Hospital Anxiety and Depression Scale                             |

|                         |      |             |             |                                                               |
|-------------------------|------|-------------|-------------|---------------------------------------------------------------|
| Monteiro et al (Cancer) | 2013 | Portugal    |             | Hospital Anxiety and Depression Scale                         |
| Jorngarden et al        | 2007 | Sweden      |             | Hospital Anxiety and Depression Scale                         |
| Kremer et al            | 2016 | Germany     |             | Hospital Anxiety and Depression Scale                         |
| Monteiro (Survivors)    | 2013 | Portugal    |             | Hospital Anxiety and Depression Scale                         |
| Kanellopoulos et al     | 2013 | Norway      |             | Hospital Anxiety and Depression Scale                         |
| van Erp et al           | 2021 | Netherlands |             | Hospital Anxiety and Depression Scale                         |
| Nathan et al            | 2018 | USA         |             | International Classification of Diseases 10th Revision        |
| Lund et al              | 2013 | Denmark     |             | International Classification of Diseases 8th to 10th Revision |
| Ahomaki et al           | 2015 | Finland     | 3/33 (9.1%) | International Classification of Diseases 8th to 10th Revision |
| D'Souza et al           | 2019 | USA         | 1/33 (3.0%) | Kiddie Schedule for Affective Disorders and Schizophrenia     |
| Barone et al            | 2020 | Italy       | 1/33 (3.0%) | Multidimensional Anxiety Scale for Children                   |
| Pedreira et al          | 2006 | Australia   | 1/33 (3.0%) | Psychological General Well-Being Index                        |
| Sargin Yildirim et al   | 2017 | Turkey      |             | Screen for Child Anxiety Related Disorders                    |
| Yaffe Ornstein et al    | 2022 | Israel      | 2/33 (6.1%) | Screen for Child Anxiety Related Disorders                    |
| Yen et al               | 2020 | USA         |             | Unspecified                                                   |
| Cantrell et al          | 2014 | USA         |             | Unspecified                                                   |
| Huang et al             | 2017 | USA         | 3/33 (9.1%) | Unspecified                                                   |



**eTable 9:** Meta-analyses of risk of severe anxiety stratified by categorical study-level characteristics using the random effects model

| Variable                                       | Cohorts | N, cancer | N, control | RR   | 95% CI       | I2  | Test of interaction (p-value) |
|------------------------------------------------|---------|-----------|------------|------|--------------|-----|-------------------------------|
| Overall                                        | 7       | 21,232    | 210,729    | 1.29 | 1.13 to 1.48 | 47% | NA                            |
| Age at data collection between 5 and 12 years  | 1       | 4,117     | 20,269     | 1.14 | 1.00 to 1.30 | NA  | 0.016                         |
| Age at data collection between 25 and 30 years | 2       | 2,816     | 460        | 1.70 | 1.07 to 2.70 | 0%  |                               |
| Age at data collection above 30 years          | 2       | 2,897     | 1,908      | 1.50 | 1.28 to 1.77 | 0%  |                               |
| Compared to matched controls                   | 3       | 12,022    | 165,996    | 1.19 | 1.03 to 1.38 | 65% | 0.12                          |
| Compared to siblings                           | 4       | 9,210     | 44,733     | 1.44 | 1.20 to 1.73 | 0%  |                               |

Abbreviations: RR, risk ratio; NA, not applicable; CI, confidence interval

**eTable 10:** Meta-analyses of risk of severe anxiety stratified by categorical study-level characteristics using the common effect model

| Variable                                       | Cohorts | N, cancer | N, control | RR   | 95% CI       | I2  | Test of interaction (p-value) |
|------------------------------------------------|---------|-----------|------------|------|--------------|-----|-------------------------------|
| Overall                                        | 7       | 21,232    | 210,729    | 1.25 | 1.15 to 1.37 | 47% | NA                            |
| Age at data collection between 5 and 12 years  | 1       | 4,117     | 20,269     | 1.14 | 0.99 to 1.30 | NA  | 0.016                         |
| Age at data collection between 25 and 30 years | 2       | 2,816     | 460        | 1.70 | 1.07 to 2.70 | 0%  |                               |
| Age at data collection above 30 years          | 2       | 2,897     | 1,908      | 1.50 | 1.28 to 1.77 | 0%  |                               |
| Compared to matched controls                   | 3       | 12,022    | 165,996    | 1.18 | 1.06 to 1.31 | 65% | 0.040                         |
| Compared to siblings                           | 4       | 9,210     | 44,733     | 1.43 | 1.23 to 1.67 | 0%  |                               |

Abbreviations: RR, risk ratio; NA, not applicable; CI, confidence interval

**eTable 11:** Meta-analyses of anxiety symptom severity stratified by categorical study-level characteristics using the common effect model

| Variable                                    | Cohorts | N, cancer | N, control | SMD   | 95% CI       | I2  | Test of interaction (p-value) |
|---------------------------------------------|---------|-----------|------------|-------|--------------|-----|-------------------------------|
| Overall                                     | 16      | 5,110     | 19,410     | 0.07  | 0.04; 0.11   | 77% | NA                            |
| After remission                             | 11      | 4906      | 18194      | 0.07  | 0.03; 0.10   | 84% | 0.37                          |
| During treatment                            | 5       | 204       | 1,216      | 0.14  | -0.02; 0.30  | 0%  |                               |
| Age range at diagnosis (0 to 5)             | 2       | 510       | 2899       | -0.19 | -0.29; -0.10 | 93% | <0.01                         |
| Age range at diagnosis (5 to 12)            | 4       | 238       | 742        | 0.33  | 0.18; 0.48   | 30% |                               |
| Age range at data collection (5 to 12)      | 2       | 76        | 90         | 0.27  | -0.03; 0.58  | 0%  | 0.05                          |
| Age range at data collection (18 to 25)     | 6       | 487       | 1232       | 0.16  | 0.05; 0.27   | 63% |                               |
| Age range at data collection (More than 25) | 5       | 3350      | 14801      | 0.04  | -0.01; 0.08  | 90% |                               |
| Asia                                        | 2       | 76        | 90         | 0.27  | -0.03; 0.58  | 0%  | 0.26                          |
| North America                               | 6       | 4,639     | 16,978     | 0.02  | -0.01; 0.06  | 88% |                               |
| Europe                                      | 6       | 226       | 1,675      | 0.12  | -0.02; 0.27  | 1%  |                               |
| Australia                                   | 1       | 18        | 18         | 0.00  | -0.73; 0.73  | NA  |                               |
| Compared to caregivers                      | 1       | 36        | 40         | 0.32  | -0.13; 0.77  | NA  | 0.13                          |



|                                                                   |   |       |        |       |             |     |      |
|-------------------------------------------------------------------|---|-------|--------|-------|-------------|-----|------|
| Compared to matched controls                                      | 9 | 478   | 10,064 | 0.12  | 0.01; 0.22  | 0%  | 0.12 |
| Compared to siblings                                              | 3 | 4,349 | 8,562  | 0.02  | -0.01; 0.06 | 95% |      |
| Scale = HADS                                                      | 6 | 337   | 2245   | 0.21  | 0.01; 0.42  | 43% |      |
| Scale = BSI-18                                                    | 3 | 4046  | 5912   | 0.10  | 0.06; 0.14  | 0%  |      |
| Scale = Novel questionnaire                                       | 2 | 106   | 8236   | 0.14  | -0.54; 0.82 | 0%  |      |
| Scale = Screen for Child Anxiety Related Disorders                | 1 | 36    | 40     | 0.32  | -0.13; 0.77 | NA  |      |
| Scale = Psychological General Well-Being Index                    | 1 | 18    | 18     | 0.00  | -0.65; 0.65 | NA  |      |
| Scale = Multidimensional Anxiety Scale for Children               | 1 | 40    | 79     | 0.51  | 0.12; 0.89  | NA  |      |
| Scale = Kiddie Schedule for Affective Disorders and Schizophrenia | 1 | 57    | 60     | -0.19 | -0.55; 0.17 | NA  |      |

Abbreviations: SMD, standardised mean difference; CI, confidence interval

**eTable 12:** Mixed effects meta-regression of standardised mean differences against potential effect moderators (continuous and categorical study-level characteristics) for the longitudinal association of anxiety symptom severity in paediatric cancer

|                        | <b>Estimate</b> | <b>P-value</b> | <b>95% CI Lower</b> | <b>95% CI Upper</b> | <b>I<sup>2</sup> (% residual heterogeneity)</b> |
|------------------------|-----------------|----------------|---------------------|---------------------|-------------------------------------------------|
| Surgery                | -1.2565         | 0.2033         | -3.7225             | 1.2095              | 55.69%                                          |
| Chemo                  | 0.3547          | 0.0806         | -0.0589             | 0.7682              | 79.80%                                          |
| Radiotherapy           | -0.1128         | 0.7777         | -1.1498             | 0.9241              | 85.32%                                          |
| Age at diagnosis       | 0.0039          | 0.7531         | -0.0253             | 0.0332              | 78.38%                                          |
| Age at data collection | -0.0147         | <b>0.0153</b>  | -0.0261             | -0.0034             | 58.20%                                          |

Abbreviations: CI, confidence interval

**eTable 13:** Diagnostic criteria used for schizophrenia and psychotic disorders by each included study

| <b>Study</b>  | <b>Publication year</b> | <b>Country of study</b> | <b>Scale used to assess schizophrenia and psychotic disorders</b>                                |
|---------------|-------------------------|-------------------------|--------------------------------------------------------------------------------------------------|
| Hoven et al   | 2020                    | Sweden                  | International Classification of Diseases 9th and 10th Revision; all psychotic disorders included |
| Ahomaki et al | 2015                    | Finland                 | International Classification of Diseases 8th to 10th Revision; all psychotic disorders included  |
| Nathan et al  | 2018                    | USA                     | International Classification of Diseases 10th Revision; all psychotic disorders included         |
| Lund et al    | 2013                    | Denmark                 | International Classification of Diseases 8th to 10th Revision; all psychotic disorders included  |
| De et al      | 2021                    | Canada                  | International Classification of Diseases 9th and 10th Revision; all psychotic disorders included |

**eTable 14:** Evaluation of the mediating or confounding effect of education level of participants on psychological outcomes

| Author              | Year | Country     | Study population                                                                                                                                                                                                                      | Key findings†                                                                                                                                                                                                                                                                                                           |
|---------------------|------|-------------|---------------------------------------------------------------------------------------------------------------------------------------------------------------------------------------------------------------------------------------|-------------------------------------------------------------------------------------------------------------------------------------------------------------------------------------------------------------------------------------------------------------------------------------------------------------------------|
| Yen et al           | 2020 | USA         | Survivors of haematological malignancies treated at St. Jude Children's Research Hospital between 1982-2005, mean age at diagnosis 9.8 ± 5.3 years                                                                                    | Non-college education increased OR for depression [OR 1.5 (1.1-2.0)] and anxiety [OR 1.3 (1.0-1.7)] compared to college education                                                                                                                                                                                       |
| Michel et al        | 2010 | Switzerland | 987 CYACs from the Swiss Childhood Cancer Survivor Study (SCCSS) with a variety of cancers, diagnosed between 1976-2003, age of diagnosis between 0-15 years                                                                          | No significant association between education (other vs university degree) and having high risk of psychological distress (OR 1.55, 95% CI 0.85-2.80, p = 0.152)                                                                                                                                                         |
| van der Geest et al | 2013 | Netherlands | 652 CYACs of various cancers who visited Erasmus MC-Sophia Children's Hospital from 2001-2009, age of diagnosis between 0-18 years.                                                                                                   | High education achievement was significantly associated with a lower HADS score (B = -1.28, p<0.01) compared to CYACs with medium educational achievement                                                                                                                                                               |
| Zebrack et al       | 2002 | USA         | 5736 CYACs of the CCSS cohort with childhood leukaemia, Hodgkin's disease, and non-Hodgkin's lymphoma, diagnosed between 1970-1986, age of diagnosis 0-20 years                                                                       | Lower education attainment (less than high school graduate vs college graduate) was associated with increased risk of depression in leukaemia survivors [RR 2.27 (1.24-4.15), p=0.008], Hodgkin's Disease survivors [RR 2.56 (1.20-5.43), p=0.024] and Non-Hodgkin's Lymphoma survivors [RR 5.15 (1.67-15.90), p=0.004] |
| Hamre et al         | 2013 | Norway      | 279 CYACs of childhood leukaemia or lymphoma (ALL, Hodgkin's disease, and non-Hodgkin's lymphoma) treated at university hospitals in Norway or Oslo University Hospital. Median age of diagnosis was 9.5 years (range 0.3-18.4 years) | No association between educational level and probability of having chronic fatigue                                                                                                                                                                                                                                      |
| Langeveld et al     | 2004 | Denmark     | 400 CYACs of various cancers from patients who attended long-term follow-up clinic at The Emma Kinderziekenhuis/ Academic Medical Center between 1996-1999, mean age at diagnosis was 8±4.6 years                                     | Low vs high education level was associated with worse MOS-24 and Worry scores (p<0.05)                                                                                                                                                                                                                                  |
| Zebrack et al       | 2004 | USA         | 14,024 CYACs from the CCSS cohort with various cancers, diagnosed between 1970-1986, age <21 years at time of diagnosis                                                                                                               | Lower education attainment (being less than high school graduate) was associated with increased raw mean BSI scores than high school graduate or college graduate (p = 0.005)                                                                                                                                           |
| Hudson et al        | 2003 | USA         | 9535 CYACs from the CCSS cohort with various cancers, diagnosed between 1970-1986, age <21 at diagnosis                                                                                                                               | Lower education attainment (being less than high school vs high school + some college) was associated with adverse mental health outcome of either depression, somatization or anxiety using the BSI-18 [OR 1.3 (1.1-1.5)]                                                                                              |

|               |      |     |                                                                                                                                                                                                                                                                                                             |                                                                                                                                                                                              |
|---------------|------|-----|-------------------------------------------------------------------------------------------------------------------------------------------------------------------------------------------------------------------------------------------------------------------------------------------------------------|----------------------------------------------------------------------------------------------------------------------------------------------------------------------------------------------|
| Zebrack et al | 2007 | USA | 2778 CYACs from the CCSS cohort with various solid tumours treated during childhood or adolescence, across 25 centres in the US and Canada                                                                                                                                                                  | Lower educational attainment was associated with higher levels of depression, anxiety and global distress                                                                                    |
| Barnes et al  | 2022 | USA | 49,836 individuals diagnosed with a first primary malignancy at 0-19 years between 1975-2016, identified from the Surveillance, Epidemiology, and End Results (SEER) database. SEER is a population-based resource composed of cancer registries across the United States covering 28% of the US population | Patients living in county with high vs low % without high school was not associated with significant increased risk of suicide after childhood cancer diagnosis [HR 0.42(0.13-1.48), p=0.15] |
| Shin et al    | 2022 | USA | 3085 CYACs from the St Jude Lifetime Cohort (SJLIFE) treated at St Jude Children's Research Hospital, age at evaluation 31.9 ±8.3 years, time since diagnosis: 28.1 ± 9.1 years                                                                                                                             | Lower education status was associated with high physical, somatic and psychological symptoms (below high school vs college graduate/post-graduate: [OR 7.71 (4.46-13.31) p<0.0001]           |

Abbreviations: ALL, Acute Lymphoblastic Leukaemia; BSI-18, Brief Symptom Inventory 18; CYACs, Children and Young Adult Cancer Survivors; CCSS, Childhood Cancer Survivor Study; HADS, Hospital Anxiety and Depression Scale; HR, Hazard Ratio; OR, Odds Ratio; RR, risk ratio

†Outcomes of interest include logistic or linear regression analysis for any association between level of education attainment and risk of mental health conditions (depression, anxiety, schizophrenia or suicide)

**eTable 15:** Evaluation of the mediating or confounding effect of income and socioeconomic status of participants on psychological outcomes

| Author             | Year | Country     | Population                                                                                                                                                                | Key findings                                                                                                                                                                                                                                                                                    |
|--------------------|------|-------------|---------------------------------------------------------------------------------------------------------------------------------------------------------------------------|-------------------------------------------------------------------------------------------------------------------------------------------------------------------------------------------------------------------------------------------------------------------------------------------------|
| Michel et al       | 2010 | Switzerland | 987 CYACs from the Swiss Childhood Cancer Survivor Study (SCSS) with a variety of cancers, diagnosed between 1976-2003, age of diagnosis between 0-15 years               | No significant association between income level and having high risk of psychological distress: CHF < 3001 vs CHF > 4500 [OR 0.68 (0.42-1.08) p=0.103]                                                                                                                                          |
| Myers et al        | 2014 | USA         | 159 CYCP with SR-ALL, with mean age at 5.9 years, who were enrolled on the COG AALL0331 protocol between 2005 and 2009 at 31 sites in the US                              | No significant association between annual family income (>\$50,000 vs <\$50,000) and anxiety [OR 1.11 (0.63-1.98), p=0.720] or depression [OR 1.17 (0.68-2.01), p=0.564]                                                                                                                        |
| Zebrack et al      | 2002 | USA         | 5736 CYACs of the CCSS cohort with childhood leukaemia, Hodgkin's disease, and non-Hodgkin's lymphoma, diagnosed between 1970-1986, age of diagnosis 0-20 years           | Increased risk of depression in lower income <\$20,000 compared to higher income >\$20,000 in leukaemia survivors [RR 2.67 (1.85-3.85), p<0.001], Hodgkin's Disease survivors [RR 2.49 (1.52-4.06), p<0.001], not significant in Non-Hodgkin's Lymphoma survivors [RR 1.23 (0.57-2.69), p=0.60] |
| Prasad et al       | 2015 | USA         | 6192 CYACs of the CCSS cohort with childhood leukaemia, Hodgkin's disease, and non-Hodgkin's lymphoma, with ages ranging from 15 to 35 years, diagnosed between 1970-1986 | Unemployment was associated with depression [OR 1.94 (1.43-2.63)]; not associated with anxiety [OR 1.0]                                                                                                                                                                                         |
| Zebrack et al      | 2004 | USA         | 14,024 CYACs from the CCSS cohort with various cancers, diagnosed between 1970-1986, age <21years at time of diagnosis                                                    | Lower income (<\$20,000 vs >\$20,000) was associated with higher raw mean BSI scores for depression (p=0.012) and anxiety (p<0.001)                                                                                                                                                             |
| Hudson et al       | 2003 | USA         | 9535 CYACs from the CCSS cohort with various cancers, diagnosed between 1970-1986, age <21 at diagnosis                                                                   | Lower household income (<\$20,000 vs >\$20,000) was associated with adverse mental health outcome of either depression, somatization or anxiety using the BSI-18 [OR 1.8 (1.5-2.0)]                                                                                                             |
| Zebrack et al      | 2007 | USA         | 2778 CYACs from the CCSS cohort with various solid tumours treated during childhood or adolescence, across 25 centres in the US and Canada                                | Living with lower household income (<\$20,000) was associated with significantly greater symptom levels across all subscales (depression, somatization and anxiety)                                                                                                                             |
| Kunin-Batson et al | 2016 | USA         | 159 children with ALL, age at diagnosis 1.0-9.9 years, enrolled on a Children's Oncology Group therapeutic study (AALL0331; NCT00103285) between 2005 and 2009            | No association between lower household income and anxiety or depression (>\$50,000 vs <\$50,000): anxiety [OR 0.55 (0.16-1.93), p=0.284]; depression [OR 0.93 (0.36-2.38), p=0.854]                                                                                                             |

|                 |      |         |                                                                                                                                                                                                                                                                                                             |                                                                                                                                                                                                                                                           |
|-----------------|------|---------|-------------------------------------------------------------------------------------------------------------------------------------------------------------------------------------------------------------------------------------------------------------------------------------------------------------|-----------------------------------------------------------------------------------------------------------------------------------------------------------------------------------------------------------------------------------------------------------|
| Foster et al    | 2017 | USA     | 666 adolescent participants from CCSS, diagnosed with Wilms tumour and treated between 1970-1999. Mean age at survey 15.3±1.7 years, mean age at diagnosis 2.8±1.8 years.                                                                                                                                   | Association between lower household income and anxiety/depression <\$40,000 compared to >\$100,000 [RR 3.05 (1.33-6.98)]                                                                                                                                  |
| Barnes et al    | 2022 | USA     | 49,836 individuals diagnosed with a first primary malignancy at 0-19 years between 1975-2016, identified from the Surveillance, Epidemiology, and End Results (SEER) database. SEER is a population-based resource composed of cancer registries across the United States covering 28% of the US population | Patients living in high vs low income county was not associated with significant increased risk of suicide after childhood cancer diagnosis [HR 0.6 (0.33-1.11), p=0.11]                                                                                  |
| Langeveld et al | 2004 | Denmark | 400 CYACs of various cancers from patients who attended long-term follow-up clinic at The Emma Kinderziekenhuis/ Academic Medical Center between 1996-1999, mean age at diagnosis was 8±4.6 years                                                                                                           | Employment status (unemployed vs employed) was associated with worse MOS-24 and Worry scores (p<0.05)                                                                                                                                                     |
| Nathan et al    | 2018 | USA     | 4117 CYACs from the Pediatric Oncology Group of Ontario's Networked Information System (POGONIS), including all paediatric cancers (0-18 years at diagnosis) treated in Ontario's 5 paediatric centres from 1985                                                                                            | Low income (lowest income quintile vs highest income quintile) at diagnosis was not associated with increased risk of mental health care visit rates [RR 1.31 (0.9-1.91), p=0.164]                                                                        |
| Schultz et al   | 2007 | USA     | 2979 CYACs from the CCSS cohort with various malignancies diagnosed between 1970-1986, age 0-9 at diagnosis                                                                                                                                                                                                 | Lower household income (<\$20,000 vs >\$60,000) was associated with risk of depression/anxiety [RR 1.3 (1.0-1.9)]                                                                                                                                         |
| De et al        | 2021 | Canada  | CYACs from The Initiative to Maximize Progress in Adolescent and Young Adult Cancer Therapy (IMPACT) database, with various malignancies, diagnosed between 1992-2012 in Ontario, age 15-21 at diagnosis                                                                                                    | High income (highest income quintile vs lowest income quintile) at diagnosis was associated with increased rate of mental health outpatient visits [RR 1.2 (1.1-1.4), p=0.003] and reduced rate of severe psychiatric episodes [RR 0.4 (0.4-1.0), p=0.04] |

Abbreviations: ALL, Acute Lymphoblastic Leukaemia; BSI-18, Brief Symptom Inventory 18; CYACs, Children and Young Adults with Cancer; CCSS Childhood Cancer Survivor Study, CCSS; HADS Hospital Anxiety and Depression Scale; HR, Hazard Ratio; OR, Odds Ratio; RR, risk ratio

†Outcomes of interest include logistic or linear regression analysis for any association between income level or any related measure of socio-economic status and risk of mental health conditions (depression, anxiety, schizophrenia or suicide)

**eTable 16:** Evaluation of the mediating or confounding effect of social environment and degree of social support of participants on psychological outcomes

| Author             | Year | Country     | Population                                                                                                                                                                               | Key findings                                                                                                                                                                                                                                                                         |
|--------------------|------|-------------|------------------------------------------------------------------------------------------------------------------------------------------------------------------------------------------|--------------------------------------------------------------------------------------------------------------------------------------------------------------------------------------------------------------------------------------------------------------------------------------|
| Yen et al          | 2020 | USA         | Survivors of haematological malignancies treated at St. Jude Children's Research Hospital between 1982-2005, mean age at diagnosis $9.8 \pm 5.3$ years                                   | Being single/divorced/other vs living with partner was associated with depression [OR 2.0 (1.5-2.6)] and anxiety [OR 1.3 (1.0-1.7)]                                                                                                                                                  |
| Michel et al       | 2010 | Switzerland | 987 CYACs from the Swiss Childhood Cancer Survivor Study (SCCSS) with a variety of cancers, diagnosed between 1976-2003, age of diagnosis between 0-15 years                             | Significantly increased risk of psychological distress [OR 1.96 (1.02-3.76), $p = 0.043$ ] if immigrant compared to being a native Swiss                                                                                                                                             |
| Myers et al        | 2014 | USA         | 159 CYCP with SR-ALL, with mean age at 5.9 years, who were enrolled on the COG AALL0331 protocol between 2005 and 2009 at 31 sites in the US                                             | Association with anxiety [OR 3.01 (1.76-5.15), $p < 0.001$ ] and depression [OR 2.37 (1.45-3.85), $p = 0.001$ ] in unhealthy family functioning than healthy family functioning, measured by the General Functioning Scale of the Family Assessment Device (FAD-GF)                  |
| Prasad et al       | 2015 | USA         | 6192 CYACs of the CCSS cohort with childhood leukaemia, Hodgkin's disease, and non-Hodgkin's lymphoma, with ages ranging from 15 to 35 years, diagnosed between 1970-1986                | Living dependently is associated with depression [OR 1.66 (1.13-2.41)]; not associated with anxiety [OR 1.0]                                                                                                                                                                         |
| Zebrack et al      | 2004 | USA         | 14,024 CYACs from the CCSS cohort with various cancers, diagnosed between 1970-1986, age $< 21$ years at time of diagnosis                                                               | Marital status: not currently married (vs married or living as married) was associated with depression ( $p < 0.001$ ) and anxiety ( $p = 0.007$ )                                                                                                                                   |
| Shin et al         | 2022 | USA         | 3085 CYACs from the St Jude Lifetime Cohort (SJLIFE) treated at St Jude Children's Research Hospital, age at evaluation $31.9 \pm 8.3$ years, time since diagnosis: $28.1 \pm 9.1$ years | Unmarried (widowed, divorced, separated or single) vs married: associated with high physical, somatic and psychological symptoms [OR 1.46 (1.05-2.05), $p = 0.026$ ]                                                                                                                 |
| Kunin-Batson et al | 2016 | USA         | 159 children with ALL, age at diagnosis 1.0-9.9 years, enrolled on a Children's Oncology Group therapeutic study (AALL0331; NCT00103285) between 2005 and 2009                           | No association with anxiety [OR 1.98 (0.61-6.43), $p < 0.225$ ], association with depression [OR 2.62 (1.61-5.92), $p = 0.024$ ] in unhealthy family functioning than healthy family functioning, measured by the General Functioning Scale of the Family Assessment Device (FAD-GF) |
| Husson et al       | 2017 | USA         | 169 participants with various cancers, mean age of diagnosis was 14-17 years in 46.7%, 18-25 years in 19.5%                                                                              | Social support was not associated with psychological distress                                                                                                                                                                                                                        |



|                 |      |         |                                                                                                                                                                                                    |                                                                                                                                                           |
|-----------------|------|---------|----------------------------------------------------------------------------------------------------------------------------------------------------------------------------------------------------|-----------------------------------------------------------------------------------------------------------------------------------------------------------|
| Hamre et al     | 2013 | Norway  | 279 CYACs of childhood leukaemia or lymphoma (ALL, NHL and HL) treated at university hospitals in Norway or Oslo University Hospital. Median age of diagnosis was 9.5 years (range 0.3-18.4 years) | No association between partnership status and probability of having chronic fatigue                                                                       |
| Langeveld et al | 2004 | Denmark | 400 CYACs of various cancers from patients who attended long-term follow-up clinic at The Emma Kinderziekenhuis/ Academic Medical Center between 1996-1999, mean age at diagnosis was 8±4.6 years  | Marital status (single vs married/cohabitant) was not associated with differences in MOS-24 and Worry scores (p<0.05)                                     |
| de Laage et al  | 2016 | France  | 348 CYACs with >5 years follow-up were recruited from Institut Gustav-Roussy and Institut Curie between Jan 2012-March 2013, age of diagnosis between 0-20 years                                   | Marital status: being married (vs single) was associated with reduced level of distress (according to BSI-18, IES and IWS) [OR 0.59 (0.33-1.03), p=0.006] |

Abbreviations: ALL, Acute Lymphoblastic Leukaemia; BSI-18, Brief Symptom Inventory 18; CYACs, Children and Young Adults with Cancer; CCSS, Childhood Cancer Survivor Study; HADS, Hospital Anxiety and Depression Scale; HR, Hazard Ratio; OR, Odds Ratio; RR, risk ratio

†Outcomes of interest include logistic or linear regression analysis for any association between social supportive factors (marriage, caregivers, social support) and risk of mental health conditions (depression, anxiety, schizophrenia or suicide)

**eTable 17:** Quality assessment of included cohort studies using the Joanna Briggs Institute Critical Appraisal tool

| Study               | 1 | 2 | 3 | 4 | 5 | 6 | 7 | 8 | 9 | 10 | 11 |
|---------------------|---|---|---|---|---|---|---|---|---|----|----|
| Hoven et al         | Y | Y | Y | Y | Y | Y | Y | Y | Y | NA | Y  |
| Lund et al          | Y | Y | Y | Y | Y | Y | Y | Y | Y | NA | Y  |
| Korhonen et al      | Y | Y | Y | Y | Y | Y | Y | Y | Y | NA | Y  |
| Kremer et al        | Y | Y | Y | N | N | U | Y | Y | Y | NA | Y  |
| Kunin-Batson et al  | N | Y | Y | N | N | U | Y | Y | Y | NA | Y  |
| Ford et al          | Y | Y | Y | Y | Y | Y | Y | Y | Y | NA | Y  |
| Cantrell et al      | Y | Y | Y | N | N | U | Y | Y | Y | NA | Y  |
| Gupta et al         | Y | Y | Y | N | N | U | Y | Y | Y | NA | Y  |
| Myers et al         | N | Y | Y | Y | Y | U | Y | Y | Y | NA | Y  |
| Monteiro et al      | Y | Y | Y | N | N | U | Y | Y | Y | NA | Y  |
| van der Geest et al | N | Y | Y | Y | U | U | Y | Y | Y | NA | Y  |
| Arabiati et al      | Y | Y | Y | Y | U | U | Y | Y | Y | NA | Y  |
| Cizek Sajko et al   | Y | Y | Y | Y | Y | Y | Y | Y | Y | NA | Y  |
| Harila et al        | Y | Y | Y | Y | Y | U | Y | Y | Y | NA | Y  |
| Tillery et al       | Y | Y | Y | Y | Y | Y | Y | Y | Y | NA | Y  |

|                                   |   |   |   |   |   |   |   |   |   |    |   |
|-----------------------------------|---|---|---|---|---|---|---|---|---|----|---|
| Ahomaki et al                     | Y | Y | Y | Y | Y | Y | Y | Y | Y | NA | Y |
| Zebrack et al<br>(Haematological) | Y | Y | Y | Y | Y | U | Y | Y | Y | NA | Y |
| Prasad et al                      | Y | Y | Y | Y | Y | Y | Y | Y | Y | NA | Y |
| Seitz et al                       | Y | Y | Y | Y | Y | Y | Y | Y | Y | NA | Y |
| Akechi et al                      | Y | Y | Y | Y | Y | Y | Y | Y | Y | NA | Y |
| Yaffe Ornstein et al              | N | Y | Y | N | N | Y | Y | Y | Y | NA | Y |
| Liu et al                         | Y | Y | Y | Y | Y | Y | Y | Y | Y | NA | Y |
| Nathan et al                      | Y | Y | Y | Y | Y | Y | Y | Y | Y | NA | Y |
| Zheng et al                       | Y | Y | Y | Y | Y | U | Y | Y | Y | NA | Y |
| Foster et al                      | Y | Y | Y | Y | Y | U | Y | Y | Y | NA | Y |
| Sargin Yildirim et al             | Y | Y | Y | Y | Y | Y | Y | Y | Y | NA | Y |
| de Laage et al                    | N | Y | Y | Y | Y | Y | Y | Y | Y | NA | Y |
| Kanellopoulos et al               | Y | Y | Y | Y | Y | U | Y | Y | Y | NA | Y |
| Li et al                          | Y | Y | Y | Y | Y | U | Y | Y | Y | NA | Y |
| Krull et al                       | Y | Y | Y | Y | Y | U | Y | Y | Y | NA | Y |
| Schrag et al                      | Y | Y | Y | Y | Y | U | Y | Y | Y | NA | Y |
| Jorngarden et al                  | N | Y | Y | Y | Y | U | Y | Y | Y | NA | Y |

|                              |   |   |   |   |   |   |   |   |   |    |   |
|------------------------------|---|---|---|---|---|---|---|---|---|----|---|
| Pedreira et al               | Y | Y | Y | N | N | U | Y | Y | Y | NA | Y |
| Zebrack et al (Brain cancer) | Y | Y | Y | Y | Y | U | Y | Y | Y | NA | Y |
| Hudson et al                 | Y | Y | Y | Y | Y | U | Y | Y | Y | NA | Y |
| De et al                     | Y | Y | Y | Y | Y | Y | Y | Y | Y | NA | Y |
| Zebrack et al (Solid cancer) | Y | Y | Y | Y | Y | U | Y | Y | Y | NA | Y |
| Schwartz                     | N | Y | Y | N | N | U | Y | Y | N | NA | Y |
| Ross et al                   | Y | Y | Y | N | N | Y | Y | Y | Y | NA | Y |
| Barnes et al                 | Y | Y | Y | Y | Y | Y | Y | Y | Y | Y  | Y |
| Ljungman et al               | Y | Y | Y | Y | Y | U | Y | Y | Y | NA | Y |
| Shin et al                   | Y | Y | Y | Y | Y | U | Y | Y | Y | NA | Y |
| Aili et al                   | Y | Y | Y | Y | Y | Y | Y | Y | Y | NA | Y |
| van Erp et al                | Y | Y | Y | Y | Y | U | Y | Y | Y | NA | Y |
| Yang et al                   | N | Y | Y | Y | U | U | Y | Y | Y | NA | Y |
| Barone et al                 | Y | Y | Y | Y | U | U | Y | Y | Y | NA | Y |
| Michel et al                 | Y | Y | Y | Y | Y | U | Y | Y | Y | Y  | Y |
| Yen et al                    | Y | Y | Y | Y | Y | U | Y | Y | Y | NA | Y |
| Brinkman et al               | Y | Y | Y | Y | Y | Y | Y | Y | Y | NA | Y |

|               |   |   |   |   |   |   |   |   |   |    |   |
|---------------|---|---|---|---|---|---|---|---|---|----|---|
| D'Souza et al | Y | Y | Y | Y | Y | U | Y | Y | Y | NA | Y |
| Huang et al   | Y | Y | Y | Y | Y | U | Y | Y | Y | NA | Y |
| Kazak et al   | Y | Y | Y | Y | Y | U | Y | Y | Y | NA | Y |
| Larsson et al | Y | Y | Y | Y | Y | U | Y | Y | Y | NA | Y |
| Yardeni et al | N | Y | Y | Y | U | U | Y | Y | Y | NA | Y |

| Checklist                                                                                                     |
|---------------------------------------------------------------------------------------------------------------|
| 1. Were the two groups similar and recruited from the same population?                                        |
| 2. Were the exposures measured similarly to assign people to both exposed and unexposed groups?               |
| 3. Was the exposure measured in a valid and reliable way?                                                     |
| 4. Were confounding factors identified?                                                                       |
| 5. Were strategies to deal with confounding factors stated?                                                   |
| 6. Were the groups/participants free of the outcome at the start of the study (or at the moment of exposure)? |
| 7. Were the outcomes measured in a valid and reliable way?                                                    |
| 8. Was the follow up time reported and sufficient to be long enough for outcomes to occur?                    |
| 9. Was follow up complete, and if not, were the reasons to loss to follow up described and explored?          |
| 10. Were strategies to address incomplete follow up utilized?                                                 |
| 11. Was appropriate statistical analysis used?                                                                |

Legend:

Y – Yes

N – No

U – Unclear

NA – Not applicable

**eFigure 1:** Depressive symptom score in CYACs, compared to non-cancer controls, using the random effects model (primary analysis) and common effect model (sensitivity analysis)

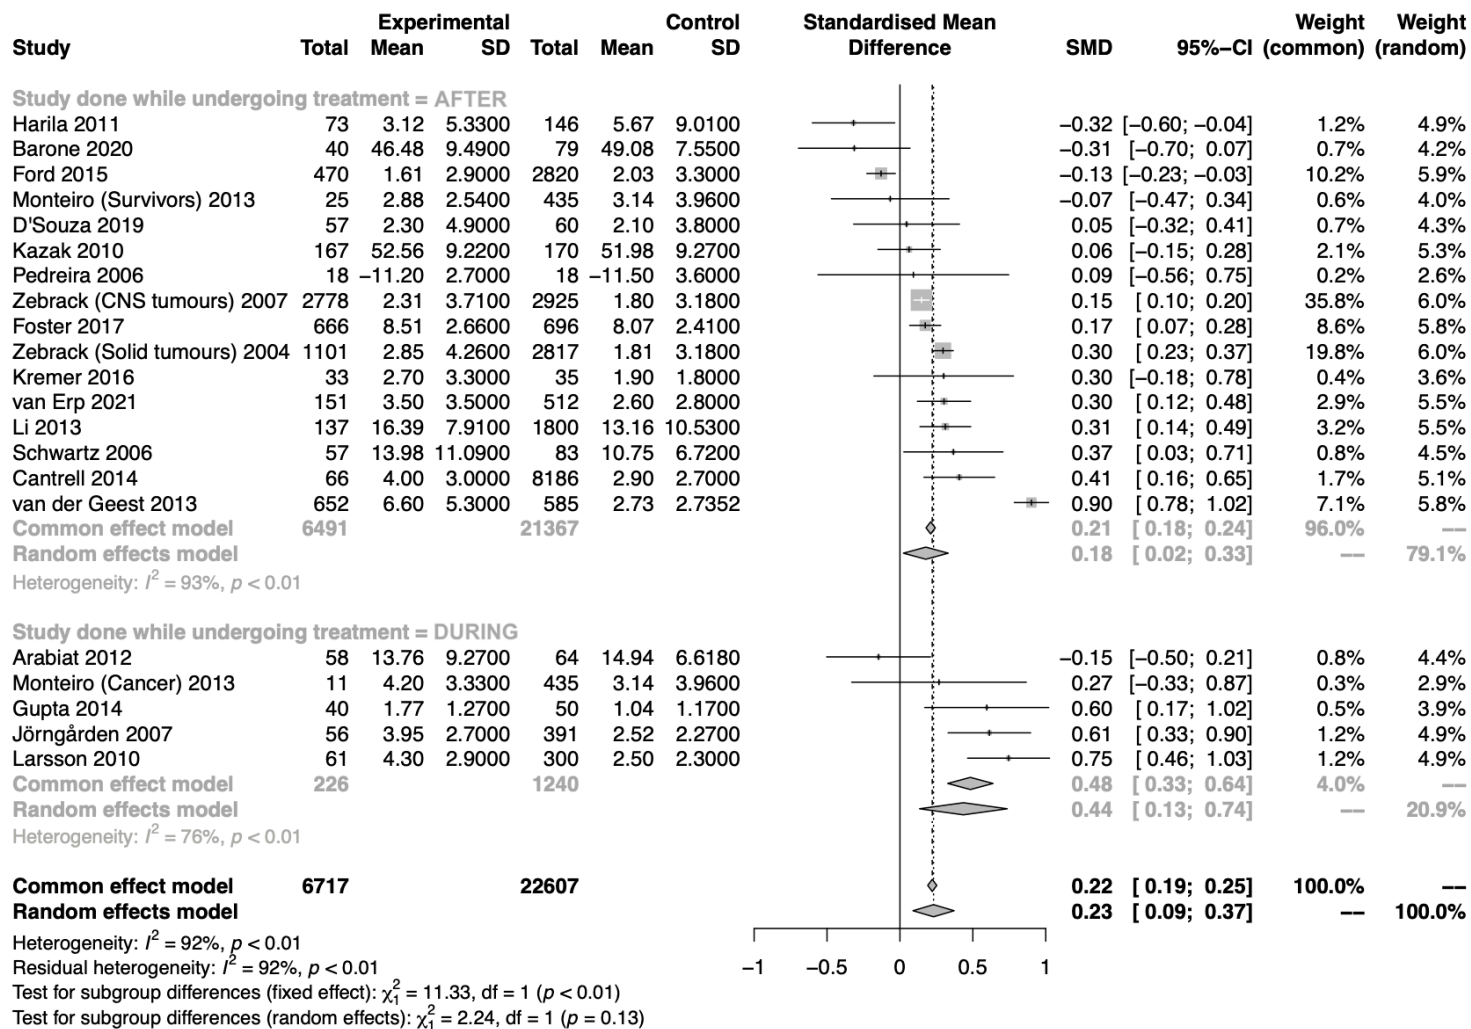

eFigure 2: Subgroup analyses of depression symptom severity stratified by scales using the random effect model

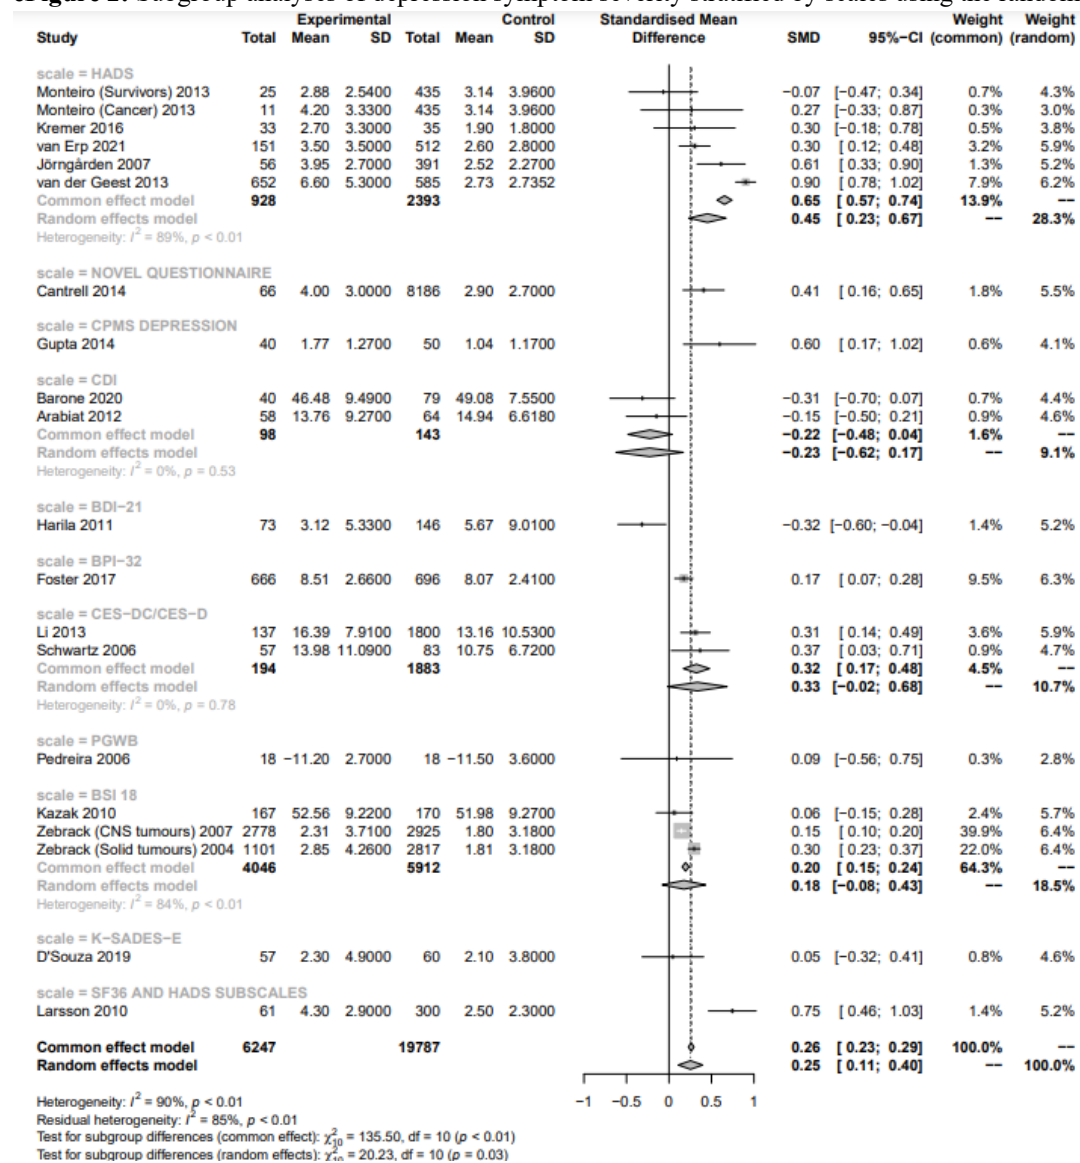

**eFigure 3:** Anxiety symptom score in CYACs, compared to non-cancer controls, using the random effects model (primary analysis) and common effect model (sensitivity analysis)

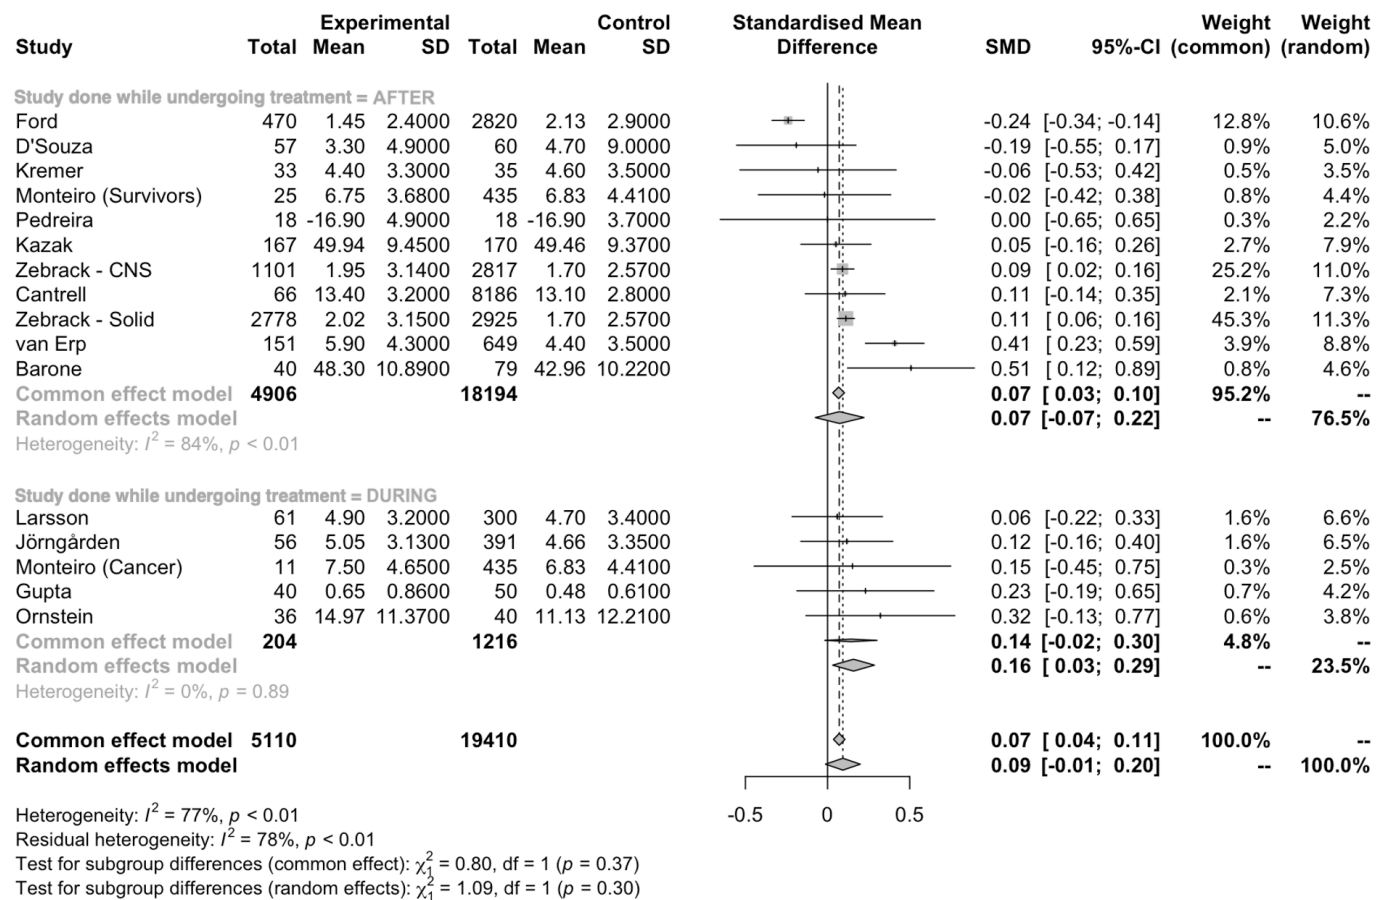



**eFigure 4:** Subgroup analyses of anxiety symptom severity stratified by scales using the random effect model

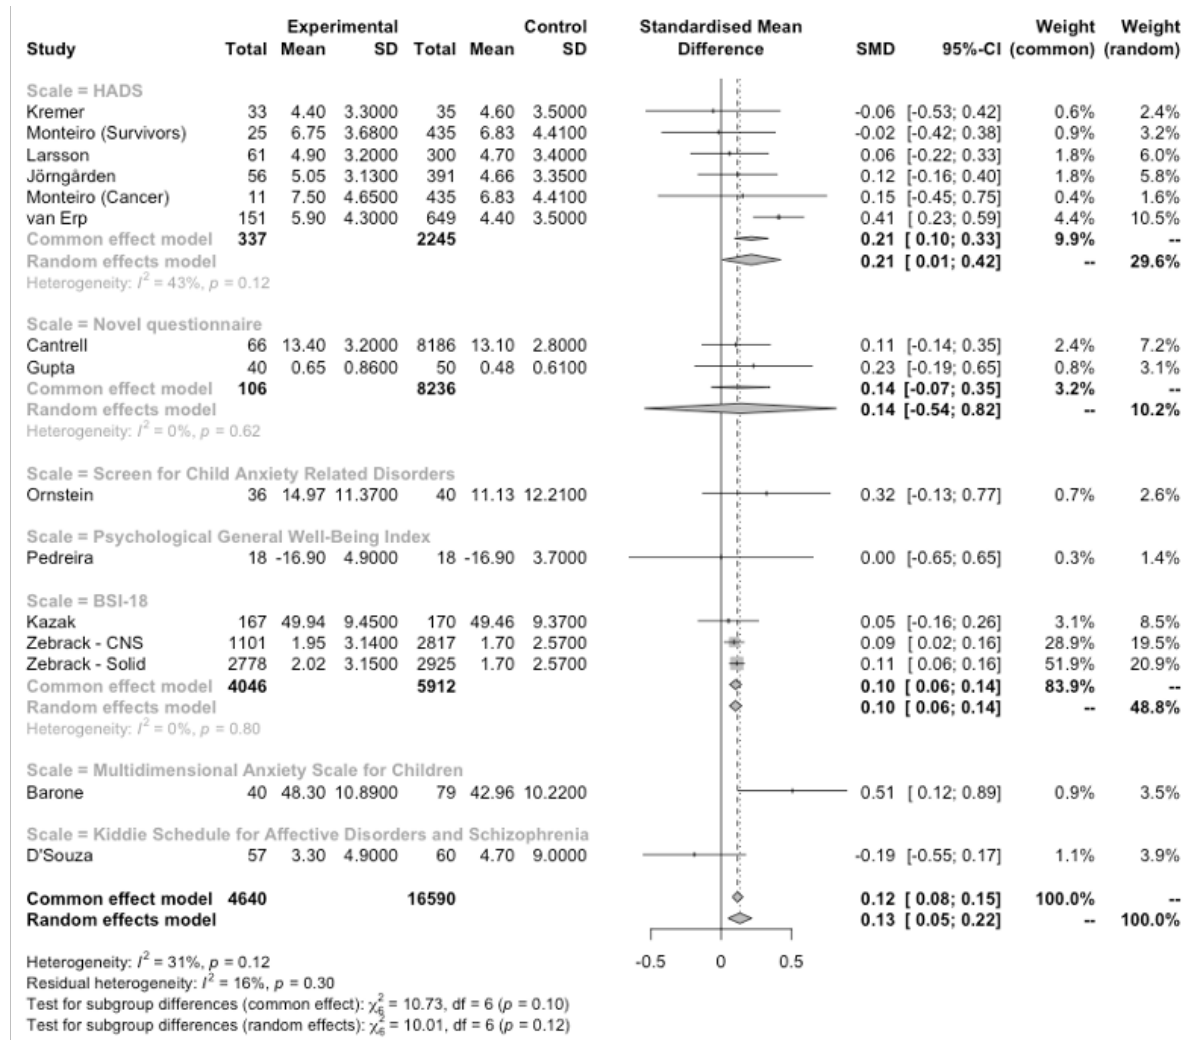

**eFigure 5.** Suicide Mortality per 100 000 Person-Years in Children, Adolescent, and Young Adult Patients With Cancer (CYACs) Compared With Controls Without Cancer

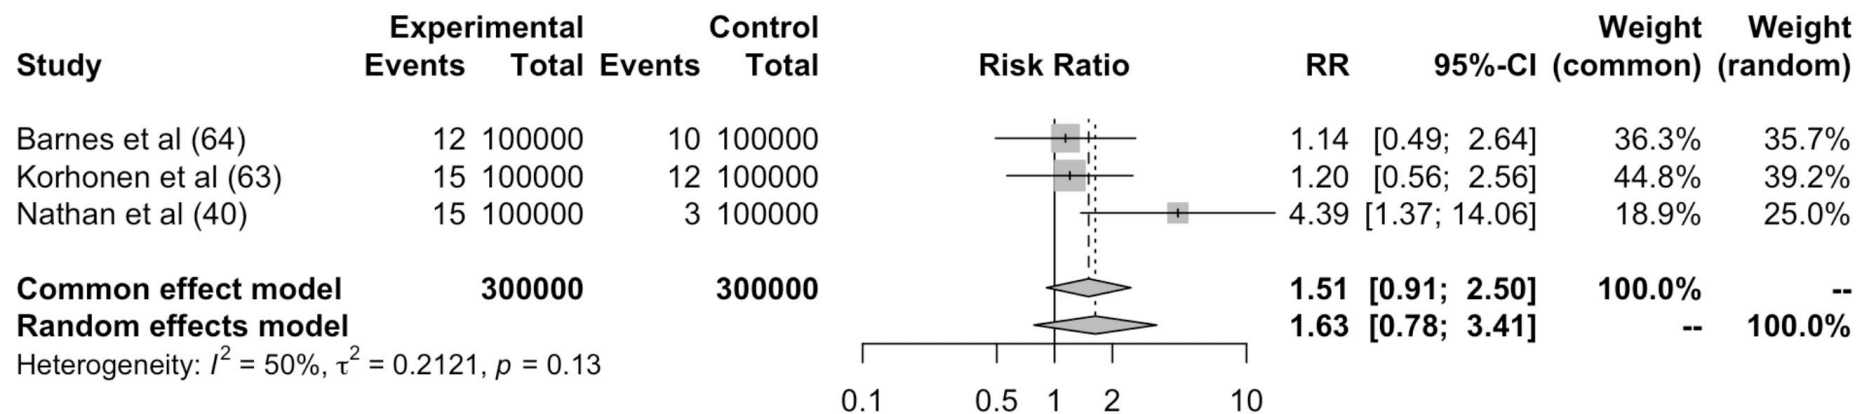

**eFigure 6:** Funnel plot for visual inspection of publication bias in studies assessing risk of severe depression

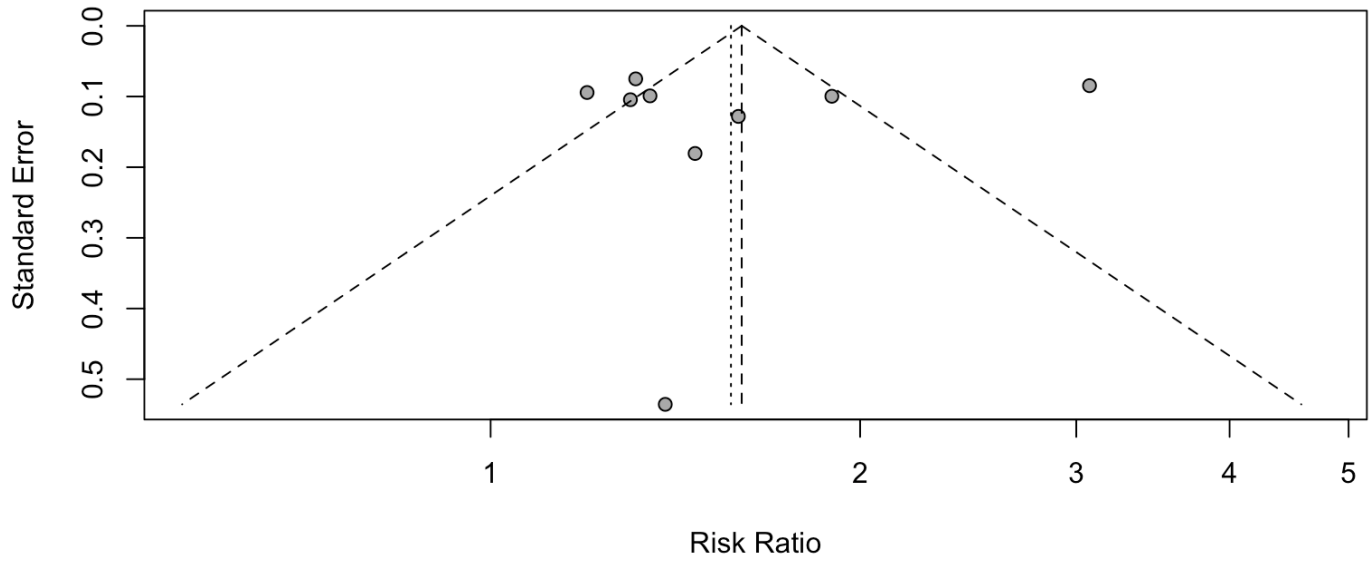

**eFigure 7:** Trim-and-fill plot for publication bias in studies assessing risk of severe depression

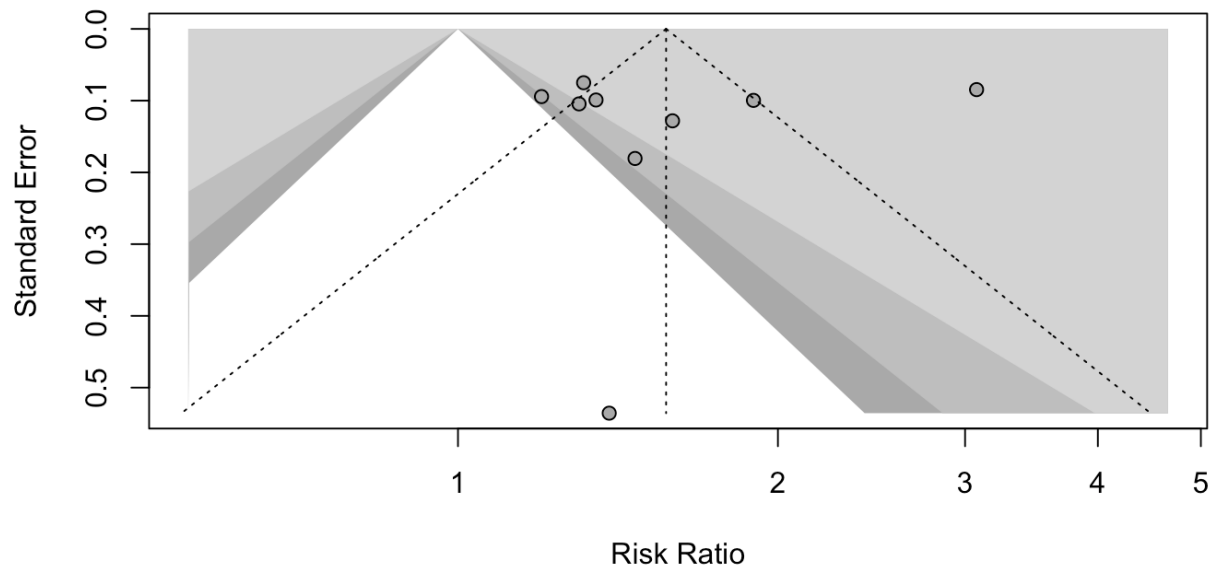

**eFigure 8:** Quantitative assessment publication bias in studies assessing risk of severe depression

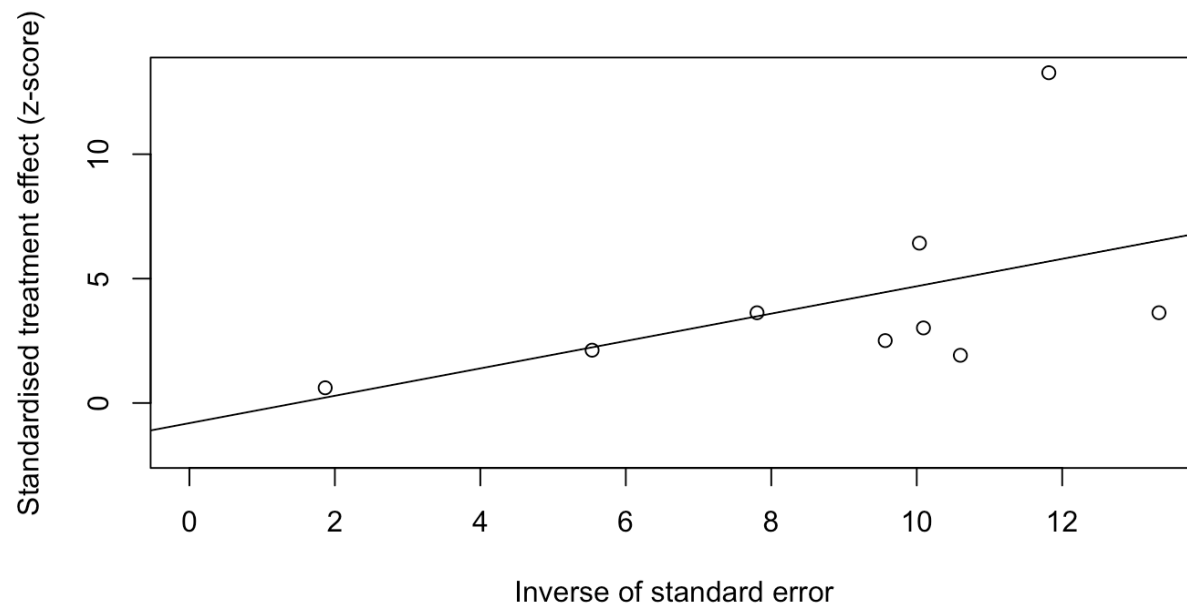

**eFigure 9:** Outlier assessment of studies assessing the risk of severe depression of CYACs, compared to non-cancer controls, using the random effects model (primary analysis) and common effect model (sensitivity analysis)

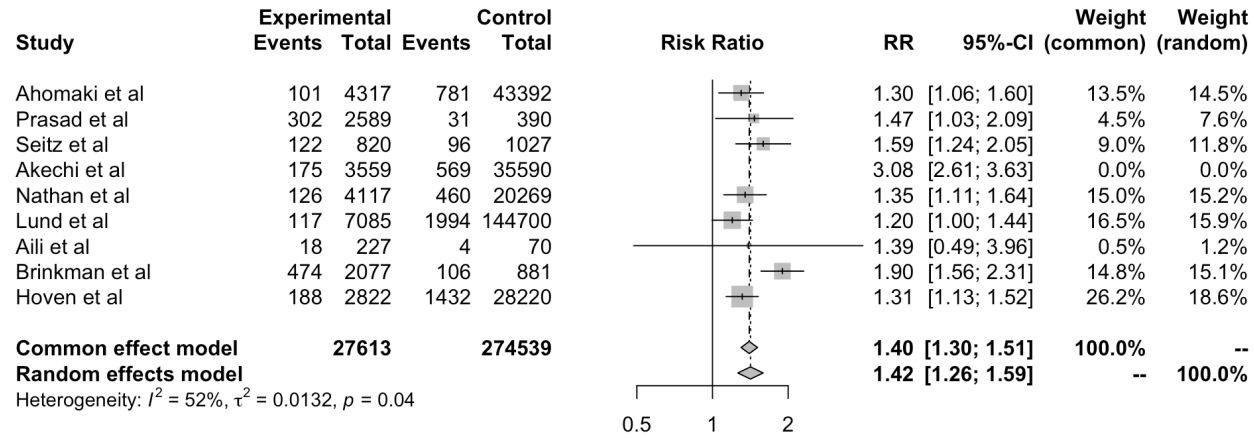

**eFigure 10:** Leave-one-out analysis of studies assessing the risk of severe depression, compared to non-cancer controls, using the random effects model (primary analysis) and common effect model (sensitivity analysis)

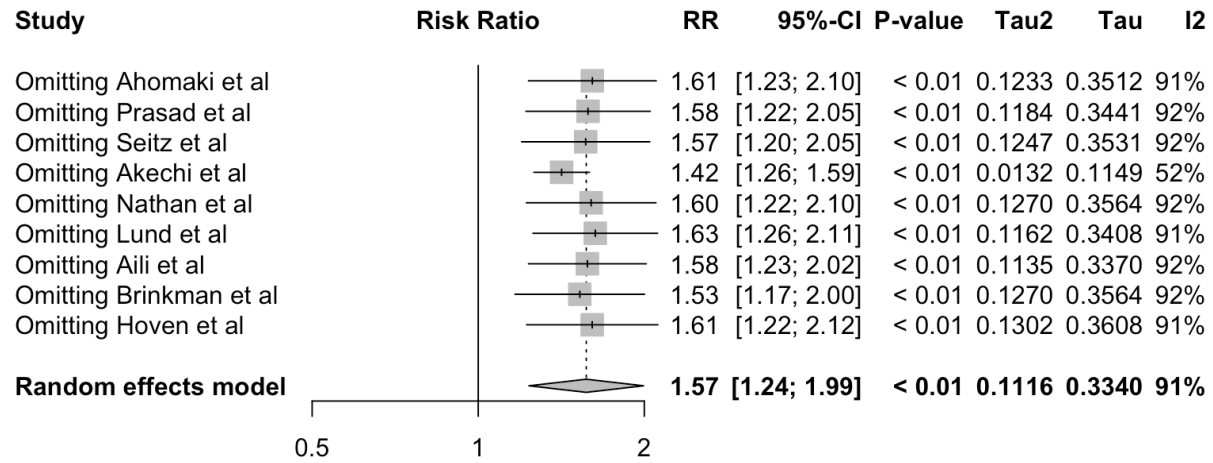

**eFigure 11:** Funnel plot for visual inspection of publication bias in studies assessing depressive symptom score

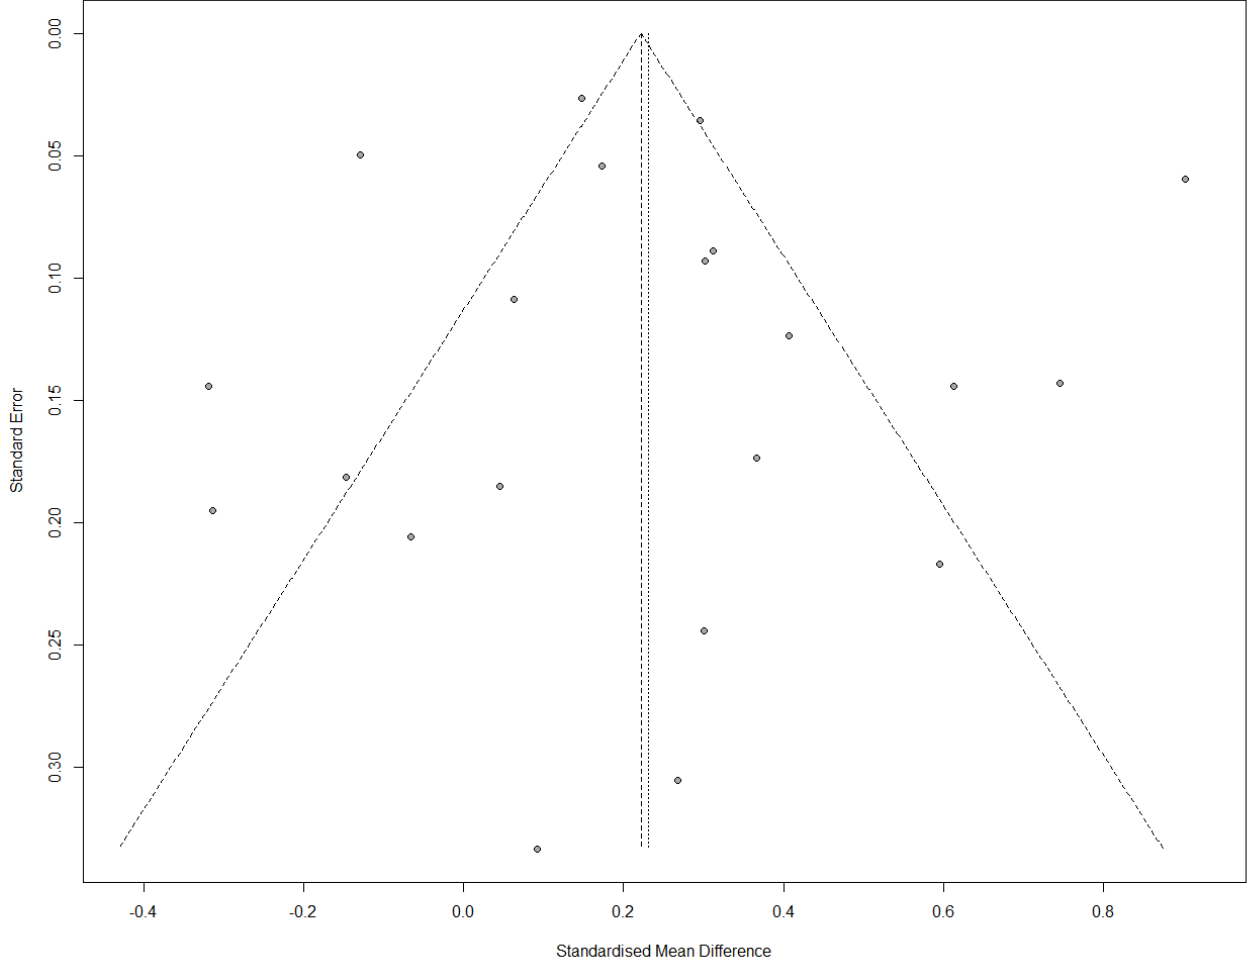



**eFigure 12:** Trim-and-fill plot for publication bias in studies assessing depressive symptom score

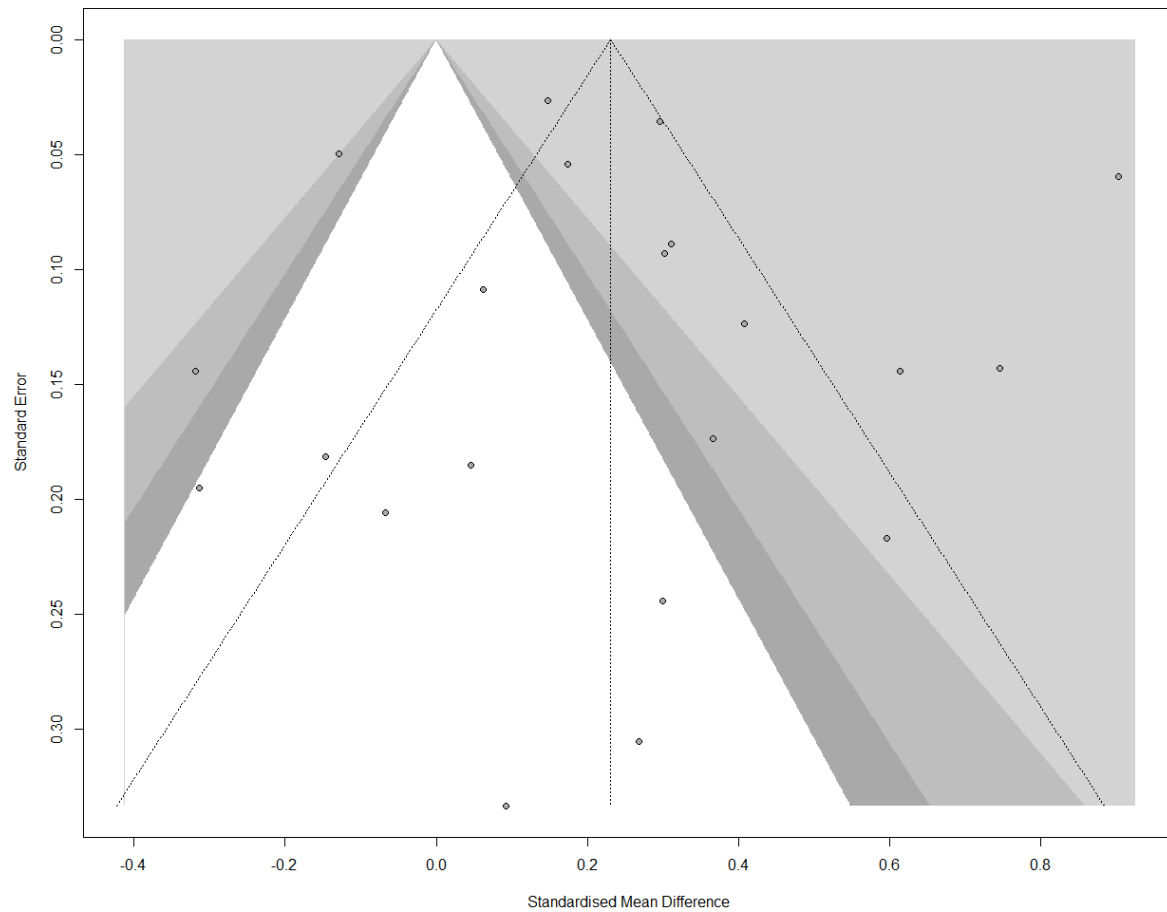

**eFigure 13:** Quantitative assessment publication bias in studies assessing depressive symptom score

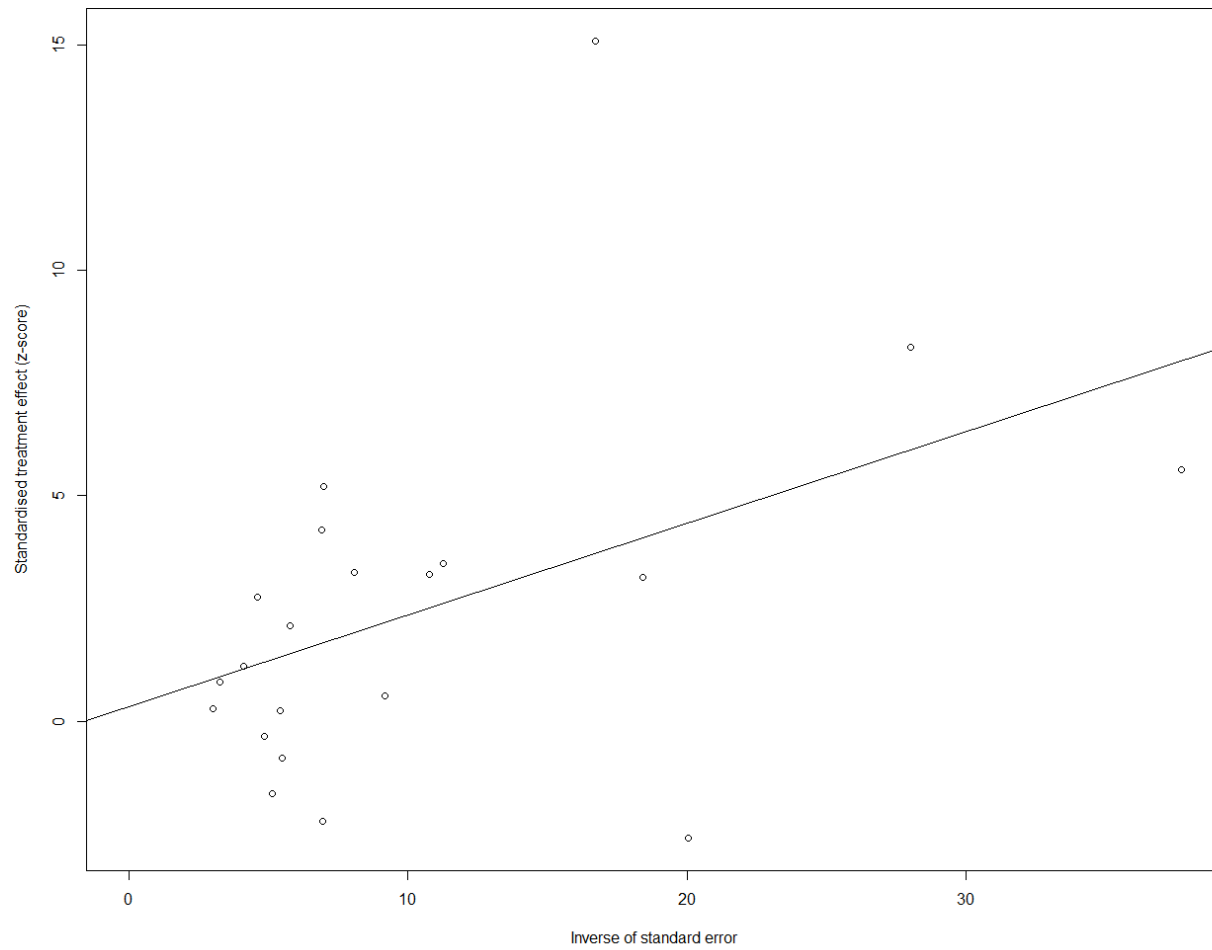

**eFigure 14:** Outlier assessment of studies assessing the depressive symptom score of CYACs, compared to non-cancer controls, using the random effects model (primary analysis) and common effect model (sensitivity analysis)

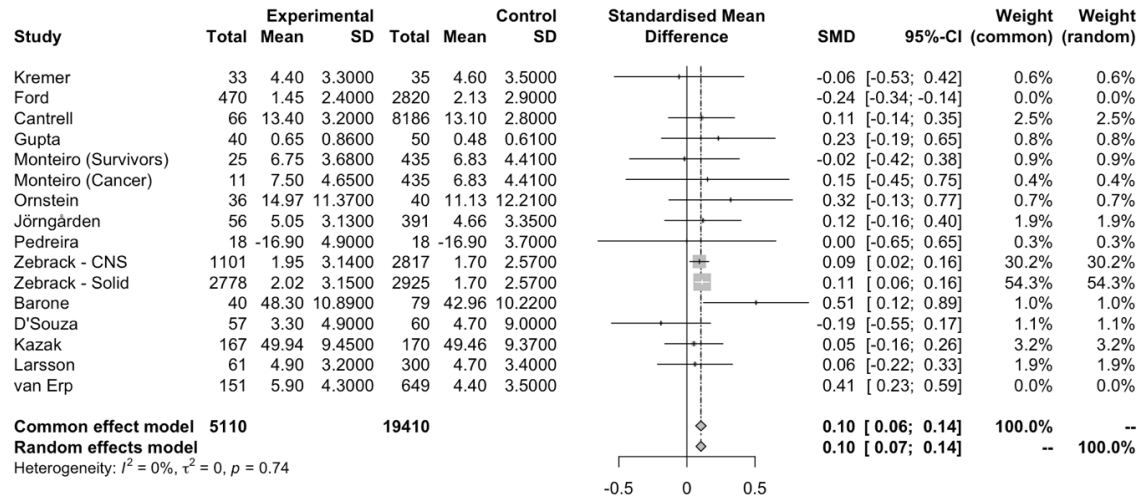

**eFigure 15:** Leave-one-out analysis of studies assessing the depressive symptom score, compared to non-cancer controls, using the random effects model (primary analysis) and common effect model (sensitivity analysis)

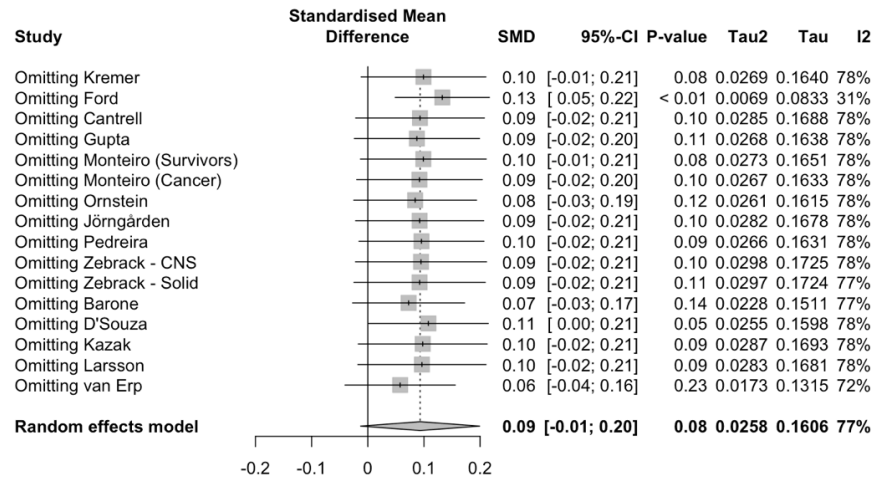

**eFigure 16:** Funnel plot for visual inspection of publication bias in studies assessing risk of severe anxiety

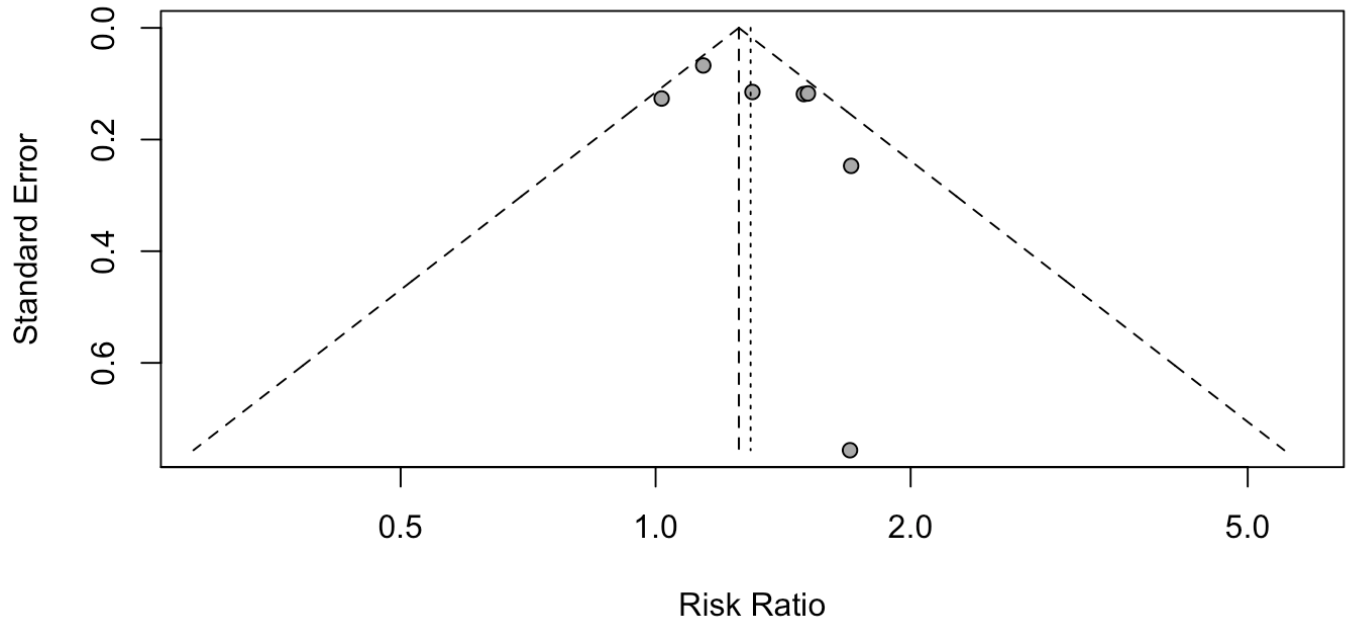

**eFigure 17:** Trim-and-fill plot for publication bias in studies assessing risk of severe anxiety

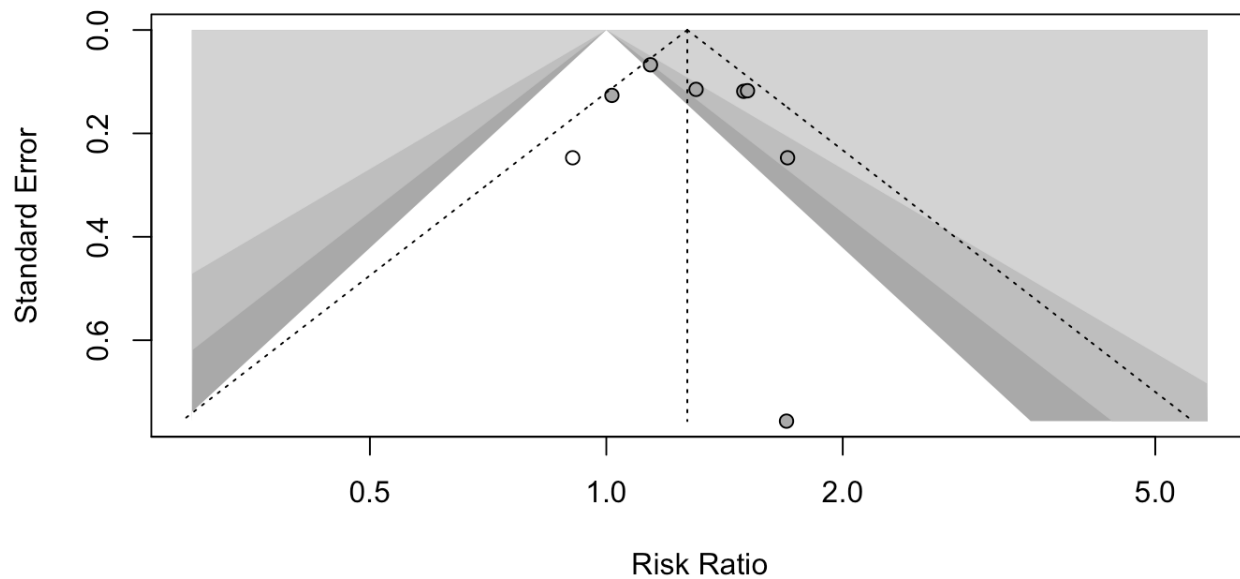

**Figure 18:** Quantitative assessment publication bias in studies assessing risk of severe anxiety

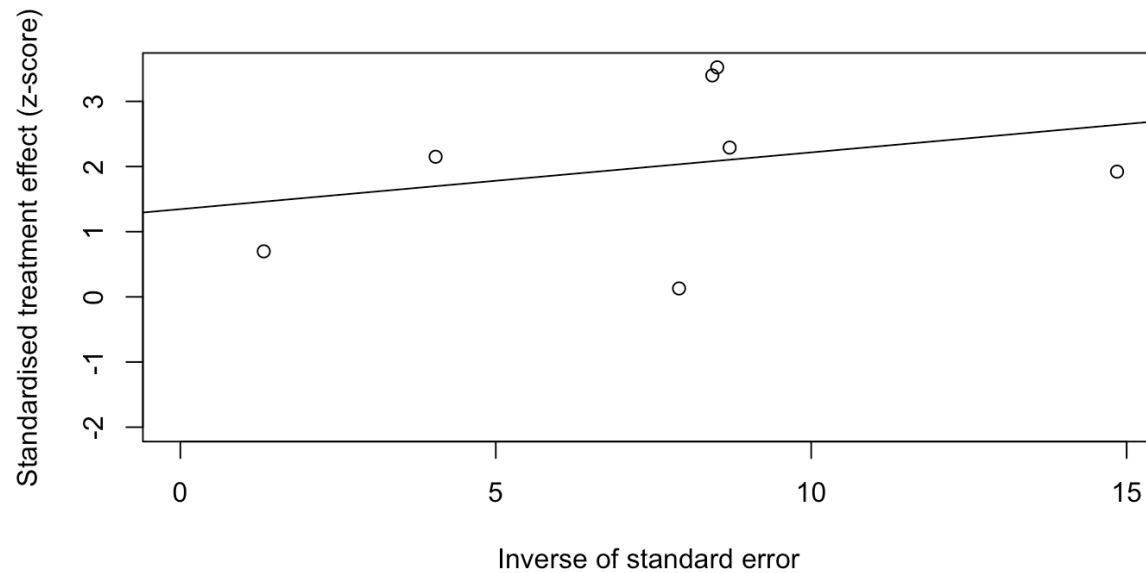

**eFigure 19:** Outlier assessment of studies assessing the risk of severe anxiety of CYACs, compared to non-cancer controls, using the random effects model (primary analysis) and common effect model (sensitivity analysis)

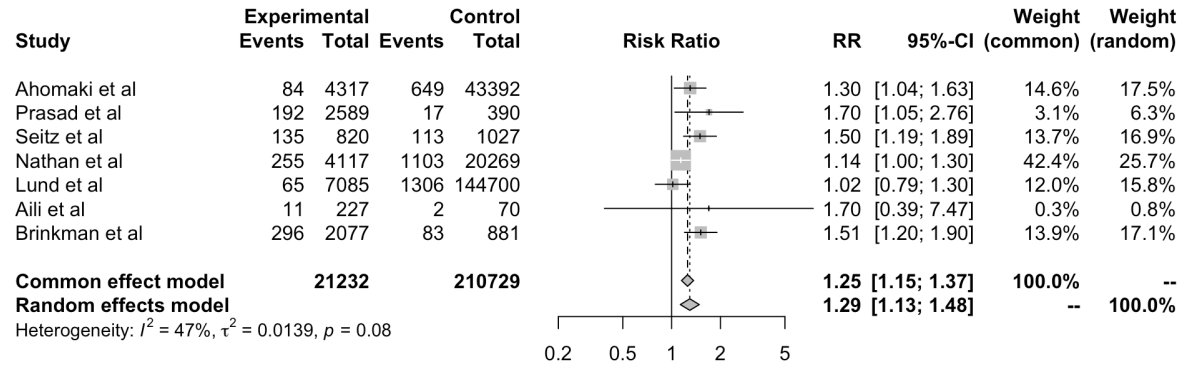



**eFigure 20:** Leave-one-out analysis of studies assessing the risk of severe anxiety, compared to non-cancer controls, using the random effects model (primary analysis) and common effect model (sensitivity analysis)

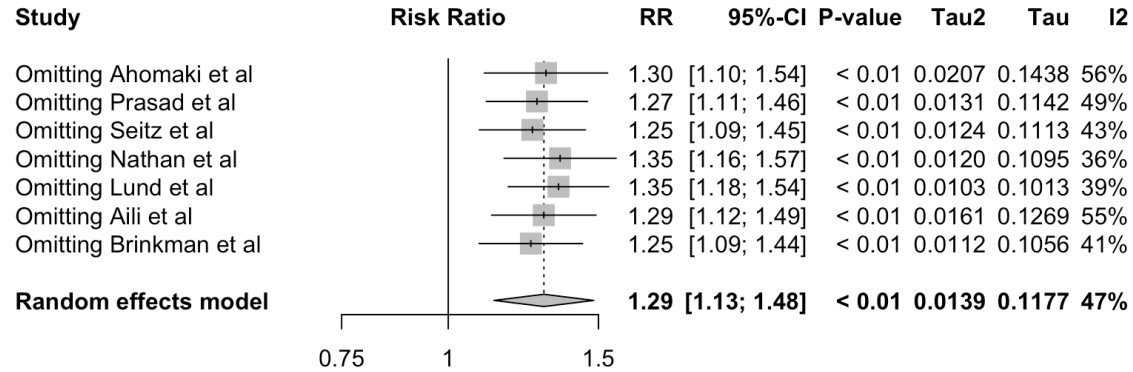

**eFigure 21:** Funnel plot for visual inspection of publication bias in studies assessing anxiety symptom score

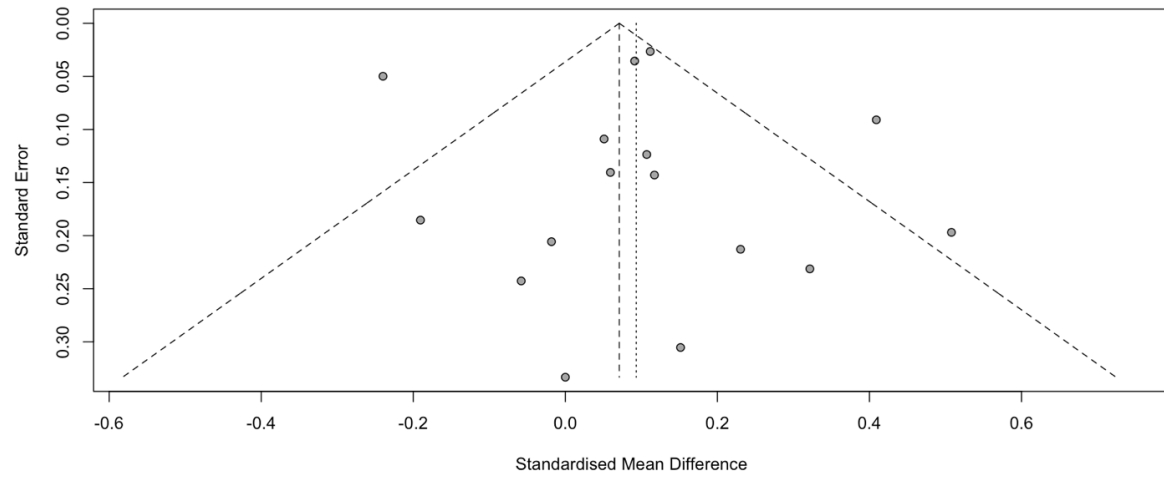

**eFigure 22:** Trim-and-fill plot for publication bias in studies assessing anxiety symptom score

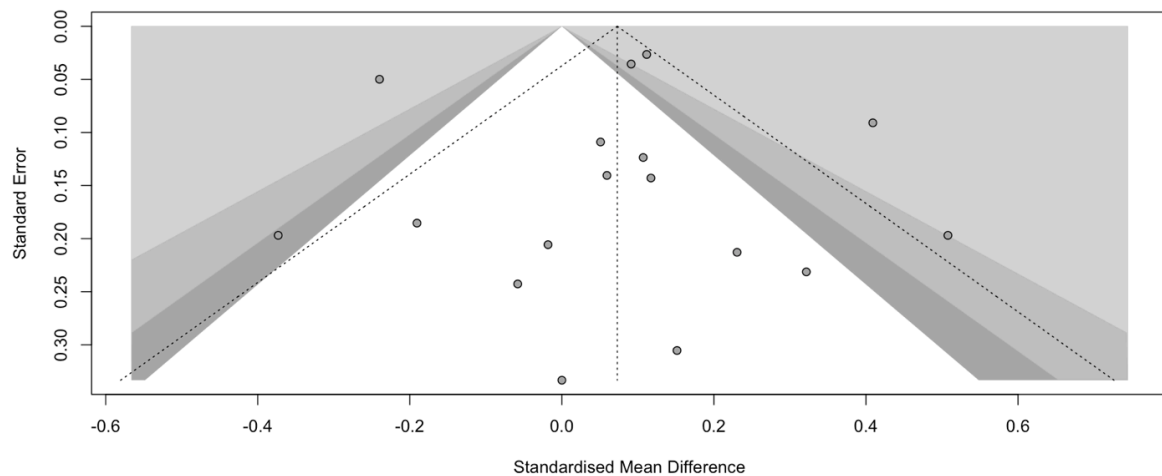

**eFigure 23:** Quantitative assessment publication bias in studies assessing anxiety symptom score

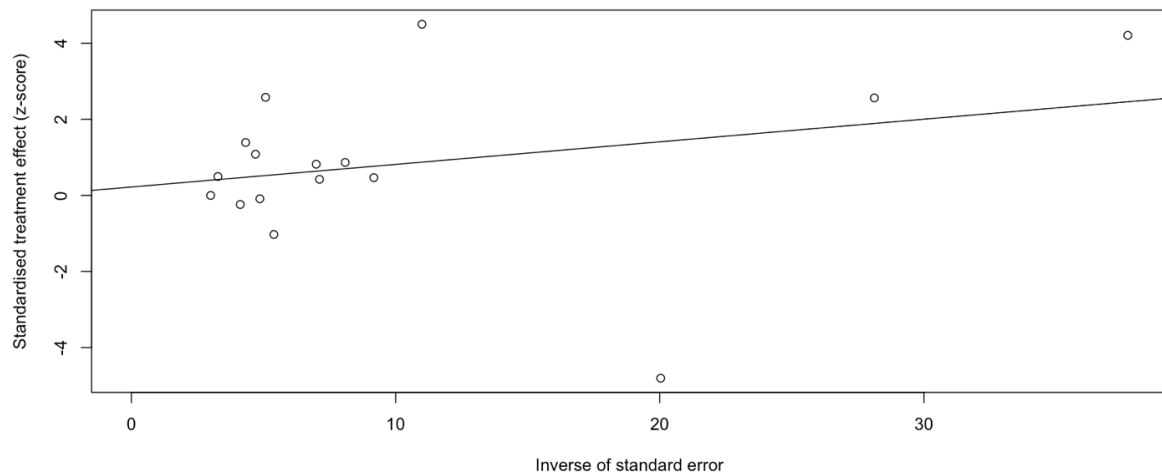

**eFigure 24:** Outlier assessment of studies assessing the anxiety symptom score of CYCP, compared to non-cancer controls, using the random effects model (primary analysis) and common effect model (sensitivity analysis)



**eFigure 25:** Leave-one-out analysis of studies assessing the anxiety symptom score, compared to non-cancer controls, using the random effects model (primary analysis) and common effect model (sensitivity analysis)



Supplement: jamapediatr-e232168-s001.pdf [file jamapediatr-e232168-s001.pdf]
