# Supplementary material
Source: PubMed Central journal article supplement (PMC10288378)
Supplement: jamapediatr-e232168-s002.pdf [file jamapediatr-e232168-s002.pdf]

## Data Sharing Statement

Lee. Lifetime Burden of Psychological Symptoms, Disorders, and Suicide Due to Cancer in Childhood, Adolescent, and Young Adult Years. *JAMA Pediatr.* Published June 22, 2023. doi:10.1001/jamapediatrics.2023.2168

### Data

**Data available:** No

### Additional Information

**Explanation for why data not available:** The original contributions presented in the study are included in the article and its supplementary material. Further inquiries can be directed to the corresponding author.
